# Supplementary material
Source: PubMed Central journal article supplement (PMC2590502)
Supplement: NIHMS79859-supplement-SupTable1A.pdf [file NIHMS79859-supplement-SupTable1A.pdf]

## SuppTable1A.xls

Supplementary Table 1A. Genes found to be upregulated in Basal Forebrain by at least 50% in response to PGD<sub>2</sub> (N=86).

| Probeset Name     | Fold Difference | Gene Name                                                                                 | Genbank # |
|-------------------|-----------------|-------------------------------------------------------------------------------------------|-----------|
| AF007583_at       | —               | Collagen-like tail subunit of asymmetric acetylcholinesterase                             | AF007583  |
| D00913_at         | —               | ICAM-1; Rattus sp. mRNA for intercellular adhesion molecule-1, complete cds.              | D00913    |
| D44591_s_at       | —               | Nitric oxide synthase 2, inducible                                                        | D44591    |
| D83661_s_at       | —               | Nitric oxide synthase 2, inducible                                                        | D83661    |
| E01884cds_s_at    | —               | DNA sequence coding for rat IL-1-beta(interleukin-1 beta).                                | E01884    |
| M26744_at         | —               | Interleukin 6                                                                             | M26744    |
| M31837_at         | —               | Insulin-like growth factor binding protein 3                                              | M31837    |
| M34253_at         | —               | Interferon regulatory factor 1                                                            | M34253    |
| M54987_at         | --              | Rat corticotropin releasing hormone (CRH) gene, complete cds.                             | M54987    |
| M86389cds_s_at    | —*              | Heat shock 27kDa protein 1                                                                | M86389    |
| rc_AA818604_s_s_i | --              | LOC361797                                                                                 | AA818604  |
| S67770_at         | --              | Transforming growth factor, beta receptor II                                              | S67770    |
| S77528cds_s_at    | —               | NFIL-6; Rattus sp. C/EBP-related transcription factor (Nfil6) mRNA, complete cds.         | S77528    |
| U22414_at         | —               | Chemokine (C-C motif) ligand 3                                                            | U22414    |
| U45965_at         | —               | Chemokine (C-X-C motif) ligand 2                                                          | U45965    |
| U48829_s_at       | —               | Nitric oxide synthase 2, inducible                                                        | U48829    |
| X03347cds_g_at    | —               | polyprotein gag-fos-p75; FBR murine osteosarcoma, complete proviral sequence              | X03347    |
| X69903_at         | —               | Interleukin 4 receptor                                                                    | X69903    |
| Z75029_s_at       | —               | Heat shock 70kD protein 1A                                                                | Z75029    |
| M98820_g_at       | 10.60^          | Interleukin 1 beta                                                                        | M98820    |
| AF021935_at       | 9.00            | Ser-Thr protein kinase related to the myotonic dystrophy protein kinase                   | AF021935  |
| X17053mRNA_s_s_f  | 8.83            | Rat immediate-early serum-responsive JE gene.                                             | X17053    |
| AF053312_s_at     | 7.65            | Small inducible cytokine subfamily A20                                                    | AF053312  |
| L16764_s_at       | 7.52            | Heat shock 70kD protein 1A                                                                | L16764    |
| J02722cds_at      | 7.47            | heme oxygenase; Rat heme oxygenase gene, complete cds.                                    | J02722    |
| rc_AA998683_g_s_i | 7.06*           | Heat shock 27kDa protein 1                                                                | AA998683  |
| X60769mRNA_at     | 6.61            | CCAAT/enhancer binding protein (C/EBP), beta                                              | X60769    |
| J04563_at         | 4.55            | putative; Rat cAMP phosphodiesterase mRNA, 3' end.                                        | J04563    |
| X91810_at         | 3.80            | Signal transducer and activator of transcription 3                                        | X91810    |
| X17053cds_s_at    | 3.77            | Rat immediate-early serum-responsive JE gene.                                             | X17053    |
| J05122_at         | 3.67            | Benzodiazepin receptor                                                                    | J05122    |
| rc_AI179610_at    | 3.42            | Heme oxygenase 1                                                                          | AI179610  |
| M29866_s_at       | 3.27*           | Complement component 3                                                                    | M29866    |
| M34253_g_at       | 3.11            | Interferon regulatory factor 1                                                            | M34253    |
| U03699complete_   | 2.99            | Nitric oxide synthase 2, inducible                                                        | U03699    |
| M91590_at         | 2.98^           | Arrestin, beta 2                                                                          | M91590    |
| X54686cds_at      | 2.95            | R.norvegicus pJunB gene.                                                                  | X54686    |
| L22558_at         | 2.85*           | 5-hydroxytryptamine (serotonin) receptor 7                                                | L22558    |
| X52477_at         | 2.76*           | Complement component 3                                                                    | X52477    |
| AJ222813_s_at     | 2.45            | Interleukin 18                                                                            | AJ222813  |
| AF028784cds#1_    | 2.40            | intermediate filament; Rattus norvegicus glial fibrillary acidic proteins alpha and delta | AF028784  |
| U48596_at         | 2.38            | Mitogen activated protein kinase kinase kinase 1                                          | U48596    |
| rc_AI102562_at    | 2.35*           | Metallothionein                                                                           | AI102562  |
| M63122_at         | 2.33            | Tumor necrosis factor receptor superfamily, member 1a                                     | M63122    |
| Y00497_s_at       | 2.33            | Superoxide dismutase 2                                                                    | Y00497    |
| U77777_s_at       | 2.33            | Interleukin 18                                                                            | U77777    |
| U42719_at         | 2.30            | Complement component 4a                                                                   | U42719    |
| M34384_at         | 2.26            | Nestin                                                                                    | M34384    |
| U14647_at         | 2.26            | Caspase 1                                                                                 | U14647    |
| X54656_at         | 2.21            | Glutamate receptor, ionotropic, AMPA3 (alpha 3)                                           | X54656    |
| rc_AI176658_s_a   | 2.16*           | Heat shock 27kDa protein 1                                                                | AI176658  |
| rc_AI071965_s_a   | 2.05            | Rattus norvegicus cDNA clone UI-R-C2-nl-e-03-0-UI 3', mRNA sequence.                      | AI071965  |
| D00913_g_at       | 2.03            | ICAM-1; Rattus sp. mRNA for intercellular adhesion molecule-1, complete cds.              | D00913    |
| rc_AI009300_at    | 2.02            | Preproenkephalin, related sequence                                                        | AI009300  |
| L26267_at         | 1.95            | Nuclear factor kappa B p105 subunit                                                       | L26267    |
| U14647_g_at       | 1.88            | Caspase 1                                                                                 | U14647    |
| X87157_at         | 1.81            | Neurolysin (metallopeptidase M3 family)                                                   | X87157    |

## SuppTable1A.xls

|                  |       |                                                                                                    |          |
|------------------|-------|----------------------------------------------------------------------------------------------------|----------|
| M11794cds#2_f_:  | 1.80* | Rat metallothionein-2 and metallothionein-1 genes, complete cds.                                   | M11794   |
| rc_AI236828_s_a' | 1.79  | Signal transducer and activator of transcription 3                                                 | AI236828 |
| AB011679_at      | 1.76  | Tubulin, beta 5                                                                                    | AB011679 |
| AF030091UTR#1_   | 1.76  | Cyclin L                                                                                           | AF030091 |
| X06769cds_g_at   | 1.75  | unnamed protein product; c-fos protein (AA 1-380); Rat c-fos mRNA.                                 | X06769   |
| U90610_at        | 1.72  | Chemokine receptor (LCR1)                                                                          | U90610   |
| L20822_at        | 1.71  | Syntaxin 5a                                                                                        | L20822   |
| D28560_at        | 1.69  | Ectonucleotide pyrophosphatase/phosphodiesterase 2                                                 | D28560   |
| S79676_s_at      | 1.68  | IL-1 beta-converting enzyme; ICE; interleukin-1 beta-converting enzyme                             | S79676   |
| M19257_at        | 1.67  | Retinol binding protein 1                                                                          | M19257   |
| AF044910_g_at    | 1.67  | Survival motor neuron                                                                              | AF044910 |
| E13732cds_at     | 1.67  | cDNA encoding rat CC chemokine receptor protein.                                                   | E13732   |
| M31076_at        | 1.67  | Transforming growth factor alpha                                                                   | M31076   |
| M23697_at        | 1.62  | Plasminogen activator, tissue                                                                      | M23697   |
| X66022mRNA#3_i   | 1.61  | Neuronal d4 domain family member                                                                   | X66022   |
| AJ132230_g_at    | 1.60  | Bradykinin receptor B1                                                                             | AJ132230 |
| U66478_at        | 1.60  | MAD homolog 1 (Drosophila)                                                                         | U66478   |
| D28560_g_at      | 1.58  | Ectonucleotide pyrophosphatase/phosphodiesterase 2                                                 | D28560   |
| rc_AI171166_at   | 1.57  | Suppression of tumorigenicity 13 (colon carcinoma) Hsp70-interacting protein                       | AI171166 |
| U23056_at        | 1.55  | <b>C-CAM4 protein</b>                                                                              | U23056   |
| Y09507_at        | 1.55  | <b>Hypoxia inducible factor 1, alpha subunit</b>                                                   | Y09507   |
| U59801_at        | 1.54  | <b>Integrin alpha M</b>                                                                            | U59801   |
| U72350_at        | 1.53  | Bcl2-like 1                                                                                        | U72350   |
| M55417exon_s_at  | 1.53  | <b>Rat protein kinase C-gamma (PRKC-gamma) gene, exon 1.</b>                                       | M55417   |
| J04486_at        | 1.52  | <b>Insulin-like growth factor binding protein 2</b>                                                | J04486   |
| J03624_at        | 1.51  | <b>Galanin</b>                                                                                     | J03624   |
| S68135_s_at      | 1.51  | glucose transporter 1; GLUT1=glucose transporter 1 {3' region} [rats, brain, mRNA Partial, 351 nt] | S68135   |
| rc_AI029920_s_a' | 1.51  | Insulin-like growth factor-binding protein 5                                                       | AI029920 |

Gene elements in bold font were also upregulated by CGS21680 in BF.

'-' denotes gene elements absent in control chips and present in PGD<sub>2</sub> chips.

\*Change confirmed as significant by Taqman analysis

^Change NOT found to be significant by Taqman analysis
