# Supplementary material
Source: PubMed Central journal article supplement (PMC2590502)
Supplement: NIHMS79859-supplement-SupTable1B.pdf [file NIHMS79859-supplement-SupTable1B.pdf]

## SuppTable1B.xls

**Supplementary Table 1B.** Genes found to be upregulated in Cerebral Cortex by at least 50% in response to PGD<sub>2</sub> (N=32).

| Probeset Name              | Fold Difference | Gene Name                                                                                       | Genbank #       |
|----------------------------|-----------------|-------------------------------------------------------------------------------------------------|-----------------|
| AF015719_s_at              | --              | Interleukin 15                                                                                  | AF015719        |
| AF048828_g_at              | --              | Voltage-dependent anion channel 1                                                               | AF048828        |
| AF052596_at                | --              | Synaptosomal-associated protein, 23 kD                                                          | AF052596        |
| <b>L16764_s_at</b>         | --              | <b>Heat shock 70kD protein 1A</b>                                                               | <b>L16764</b>   |
| M27223_at                  | --              | Rat Na <sup>+</sup> channel mRNA, 3' end.                                                       | M27223          |
| <b>M29866_s_at</b>         | --              | <b>Complement component 3</b>                                                                   | <b>M29866</b>   |
| <b>M54987_at</b>           | --              | <b>Rat corticotropin releasing hormone (CRH) gene, complete cds.</b>                            | <b>M54987</b>   |
| <b>S77863_s_at</b>         | --              | <b>mu-opioid receptor MOR [rats, peritoneal macrophages, mRNA Partial, 720 nt].</b>             | <b>S77863</b>   |
| <b>X52477_at</b>           | --*             | <b>Complement component 3</b>                                                                   | <b>X52477</b>   |
| X87157_at                  | --              | Neurolysin (metallopeptidase M3 family)                                                         | X87157          |
| <b>U78090_s_at</b>         | <b>10.68</b>    | <b>Potassium channel regulator 1</b>                                                            | <b>U78090</b>   |
| <b>X60769mRNA_at</b>       | <b>7.54</b>     | <b>CCAAT/enhancer binding protein (C/EBP), beta</b>                                             | <b>X60769</b>   |
| <b>rc_AA998683_g_at</b>    | <b>5.90*</b>    | <b>Heat shock 27kDa protein 1</b>                                                               | <b>AA998683</b> |
| <b>M11794cds#2_f_at</b>    | <b>5.16*</b>    | <b>Rat metallothionein-2 and metallothionein-1 genes</b>                                        | <b>M11794</b>   |
| <b>rc_AI176456_at</b>      | <b>3.32</b>     | <b>Transcribed locus, highly similar to NP_032656.1 metallothionein 2 [Mus musculus]</b>        | <b>AI176456</b> |
| <b>AF028784cds#1_s_at</b>  | <b>3.01</b>     | <b>intermediate filament; Rattus norvegicus glial fibrillary acidic proteins alpha and delt</b> | <b>AF028784</b> |
| <b>rc_AI176658_s_at</b>    | <b>3.01*</b>    | <b>Heat shock 27kDa protein 1</b>                                                               | <b>AI176658</b> |
| <b>X62952_at</b>           | <b>2.80</b>     | <b>Vimentin</b>                                                                                 | <b>X62952</b>   |
| <b>rc_AI146018_s_at</b>    | <b>2.74</b>     | <b>Transcribed locus, highly similar to NP_004792.1 neurexin 1 [Homo sapiens]</b>               | <b>AI146018</b> |
| <b>AF053312_s_at</b>       | <b>2.72</b>     | <b>Small inducible cytokine subfamily A20</b>                                                   | <b>AF053312</b> |
| <b>J05122_at</b>           | <b>2.52</b>     | <b>Benzodiazepin receptor</b>                                                                   | <b>J05122</b>   |
| <b>AF028784mRNA#1_s_at</b> | <b>1.92</b>     | <b>intermediate filament; Rattus norvegicus glial fibrillary acidic proteins alpha and delt</b> | <b>AF028784</b> |
| <b>L35771_at</b>           | <b>1.88</b>     | <b>Potassium inwardly-rectifying channel, subfamily J, member 5</b>                             | <b>L35771</b>   |
| <b>L23088_at</b>           | <b>1.85</b>     | <b>Selectin, platelet</b>                                                                       | <b>L23088</b>   |
| <b>rc_AI229237_at</b>      | <b>1.84</b>     | <b>Opioid receptor-like</b>                                                                     | <b>AI229237</b> |
| <b>D14987_f_at</b>         | <b>1.78</b>     | <b>Sulfotransferase, hydroxysteroid preferring 2</b>                                            | <b>D14987</b>   |
| <b>rc_AI102562_at</b>      | <b>1.73*</b>    | <b>Metallothionein</b>                                                                          | <b>AI102562</b> |
| <b>U48596_at</b>           | <b>1.73</b>     | <b>Mitogen activated protein kinase kinase kinase 1</b>                                         | <b>U48596</b>   |
| <b>U31866_g_at</b>         | <b>1.66</b>     | <b>Transcribed locus, moderately similar to NP_598738.1 transferrin [Mus musculus]</b>          | <b>U31866</b>   |
| <b>U17995_at</b>           | <b>1.61</b>     | <b>Rattus norvegicus kappa opioid receptor gene, exon 4 and complete cds.</b>                   | <b>U17995</b>   |
| <b>M58587_at</b>           | <b>1.58</b>     | <b>Interleukin 6 receptor</b>                                                                   | <b>M58587</b>   |
| <b>rc_AI170268_at</b>      | <b>1.51</b>     | <b>Beta-2 microglobulin</b>                                                                     | <b>AI170268</b> |

Gene elements in bold font were also upregulated by CGS21680 in Cx.

'--' denotes gene elements absent in control chips and present in PGD<sub>2</sub> chips.

\*Change confirmed as significant by Taqman analysis

^Change NOT found to be significant by Taqman analysis
