# Supplementary material
Source: PubMed Central journal article supplement (PMC2590502)
Supplement: NIHMS79859-supplement-SupTable1C.pdf [file NIHMS79859-supplement-SupTable1C.pdf]

## SuppTable1C.xls

**Supplementary Table 1C.** Genes found to be upregulated in Hypothalamus by at least 50% in response to PGD<sub>2</sub> (N=92).

| Probeset Name   | Fold Difference | Gene Name                                                                                        | Genbank #       |
|-----------------|-----------------|--------------------------------------------------------------------------------------------------|-----------------|
| AF038571_s_at   | --              | Solute carrier family 1, member 1                                                                | AF038571        |
| AF050663UTR#1_  | --              | Activity and neurotransmitter-induced early gene 11 (ania-11) mRNA, 3' UTR                       | AF050663        |
| D00913_at       | --              | <b>ICAM-1; Rattus sp. mRNA for intercellular adhesion molecule-1, complete cds.</b>              | <b>D00913</b>   |
| D00913_g_at     | --              | <b>ICAM-1; Rattus sp. mRNA for intercellular adhesion molecule-1, complete cds.</b>              | <b>D00913</b>   |
| D10106_s_at     | --              | <b>prepropeptide; Rat mRNA for platelet-derived growth factor A chain.</b>                       | <b>D10106</b>   |
| D13213_s_at     | --              | <b>Glutamate receptor, ionotropic, NMDA2D</b>                                                    | <b>D13213</b>   |
| D25233cds_at    | --              | <b>Retinoblastoma 1</b>                                                                          | <b>D25233</b>   |
| J02722cds_at    | --              | heme oxygenase; Rat heme oxygenase gene, complete cds.                                           | J02722          |
| M29866_s_at     | --*             | <b>Complement component 3</b>                                                                    | <b>M29866</b>   |
| M34253_at       | --              | Interferon regulatory factor 1                                                                   | M34253          |
| M86389cds_s_at  | --*             | <b>Heat shock 27kDa protein 1</b>                                                                | <b>M86389</b>   |
| rc_AI029183_s_a | --              | Gap junction membrane channel protein alpha 1                                                    | AI029183        |
| rc_AI071965_s_a | --              | <b>Rattus norvegicus cDNA clone UI-R-C2-nl-e-03-0-UI 3', mRNA sequence.</b>                      | <b>AI071965</b> |
| S44606_s_at     | --              | beta-integrin {clone RF-17} [rats, basophilic leukemia cell line RBL, mRNA Partial, 543 nt       | S44606          |
| U08257_at       | --              | Glutamate receptor, ionotropic, kainate 4                                                        | U08257          |
| U08259_r_at     | --              | Glutamate receptor, ionotropic, NMDA2C                                                           | U08259          |
| U14533_at       | --              | Nuclear receptor subfamily 1, group H, member 2                                                  | U14533          |
| U14647_g_at     | --              | <b>Caspase 1</b>                                                                                 | <b>U14647</b>   |
| U18650_at       | --              | <b>Huntington disease gene homolog</b>                                                           | <b>U18650</b>   |
| U75210_s_at     | --              | Potassium voltage-gated channel, subfamily H (eag-related), member 2                             | U75210          |
| U77933_at       | --              | Caspase 2                                                                                        | U77933          |
| X03347cds_g_at  | --              | <b>polyprotein gag-fos-p75; FBR murine osteosarcoma, complete proviral sequence</b>              | <b>X03347</b>   |
| X17053cds_s_at  | --              | <b>Rat immediate-early serum-responsive JE gene.</b>                                             | <b>X17053</b>   |
| X17053mRNA_s_a  | --              | <b>Rat immediate-early serum-responsive JE gene.</b>                                             | <b>X17053</b>   |
| X74835cds_at    | --              | Cholinergic receptor, nicotinic, delta polypeptide                                               | X74835          |
| rc_AI137246_s_a | 64.53           | <b>Ig VH193020=anti-insulin 193020 monoclonal antibody heavy chain variable region</b>           | <b>S65980</b>   |
| U42719_at       | 59.30           | <b>Complement component 4a</b>                                                                   | <b>U42719</b>   |
| AF044910_at     | 18.60           | Survival motor neuron                                                                            | AF044910        |
| X52477_at       | 12.58*          | <b>Complement component 3</b>                                                                    | <b>X52477</b>   |
| rc_AA998683_g_  | 9.81*           | <b>Heat shock 27kDa protein 1</b>                                                                | <b>AA998683</b> |
| M17960_at       | 8.68            | <b>Insulin-like growth factor 2</b>                                                              | <b>M17960</b>   |
| J05122_at       | 7.44            | <b>Benzodiazepin receptor</b>                                                                    | <b>J05122</b>   |
| AF027954_at     | 5.33^           | <b>Bcl-2-related ovarian killer protein (bok)</b>                                                | <b>AF027954</b> |
| AF053312_s_at   | 5.09            | <b>Small inducible cytokine subfamily A20</b>                                                    | <b>AF053312</b> |
| X54686cds_at    | 5.06            | <b>R.norvegicus pJunB gene.</b>                                                                  | <b>X54686</b>   |
| rc_AI176658_s_a | 5.02            | <b>Heat shock 27kDa protein 1</b>                                                                | <b>AI176658</b> |
| AF028784cds#1_  | 4.20            | <b>intermediate filament; Rattus norvegicus glial fibrillary acidic proteins alpha and delta</b> | <b>AF028784</b> |
| U14647_at       | 4.11            | <b>Caspase 1</b>                                                                                 | <b>U14647</b>   |
| M11794cds#2_f_  | 4.04*           | <b>Rat metallothionein-2 and metallothionein-1 genes, complete cds.</b>                          | <b>M11794</b>   |
| L16764_s_at     | 4.03            | Heat shock 70kD protein 1A                                                                       | L16764          |
| M58587_at       | 3.51            | <b>Interleukin 6 receptor</b>                                                                    | <b>M58587</b>   |
| rc_AI102562_at  | 3.48*           | <b>Metallothionein</b>                                                                           | <b>AI102562</b> |
| Z75029_s_at     | 3.37            | <b>Heat shock 70kD protein 1A</b>                                                                | <b>Z75029</b>   |
| U49729_at       | 3.25            | <b>Bcl2-associated X protein</b>                                                                 | <b>U49729</b>   |
| M34253_g_at     | 3.01            | <b>Interferon regulatory factor 1</b>                                                            | <b>M34253</b>   |
| U78090_s_at     | 2.76            | Potassium channel regulator 1                                                                    | U78090          |
| S48813_s_at     | 2.74            | <b>beta-ARK; beta-adrenergic receptor kinase [rats, brain, mRNA Partial, 2141 nt].</b>           | <b>S48813</b>   |

## SuppTable1C.xls

|                 |      |                                                                                     |          |
|-----------------|------|-------------------------------------------------------------------------------------|----------|
| rc_AI176456_at  | 2.67 | Transcribed locus, highly similar to NP_032656.1 metallothionein 2 [Mus musculus]   | AI176456 |
| X91810_at       | 2.62 | Signal transducer and activator of transcription 3                                  | X91810   |
| AJ222813_s_at   | 2.58 | Interleukin 18                                                                      | AJ222813 |
| rc_AA945583_at  | 2.55 | Hydroxysteroid (17-beta) dehydrogenase 10                                           | AA945583 |
| rc_AI179610_at  | 2.35 | Heme oxygenase 1                                                                    | AI179610 |
| X99267_at       | 2.27 | Presenilin-2                                                                        | X99267   |
| M63122_at       | 2.27 | Tumor necrosis factor receptor superfamily, member 1a                               | M63122   |
| AF022952_at     | 2.21 | Vascular endothelial growth factor B                                                | AF022952 |
| U77777_s_at     | 2.19 | Interleukin 18                                                                      | U77777   |
| X62952_at       | 2.16 | Vimentin                                                                            | X62952   |
| U67140_at       | 2.15 | Disks large-associated protein 4                                                    | U67140   |
| rc_AI235747_at  | 2.10 | Glutathione-S-transferase, alpha type2                                              | AI235747 |
| L20821_at       | 2.08 | Syntaxin 4                                                                          | L20821   |
| AJ012603UTR#1_  | 2.06 | A disintegrin and metalloproteinase domain 17                                       | AJ012603 |
| U31866_g_at     | 2.06 | Transcribed locus, moderately similar to NP_598738.1 transferrin [Mus musculus]     | U31866   |
| AJ001641_at     | 2.02 | POU domain, class 3, transcription factor 3                                         | AJ001641 |
| U48596_at       | 1.96 | Mitogen activated protein kinase kinase kinase 1                                    | U48596   |
| J04563_at       | 1.95 | putative; Rat cAMP phosphodiesterase mRNA, 3' end.                                  | J04563   |
| rc_AI236828_s_a | 1.95 | Signal transducer and activator of transcription 3                                  | AI236828 |
| U47031_at       | 1.93 | Purinergic receptor P2X, ligand-gated ion channel, 4                                | U47031   |
| U90312_at       | 1.91 | Synaptojanin 2                                                                      | U90312   |
| rc_AA964003_s_  | 1.89 | MHC class II RT1-D beta1 chain haplotype a                                          | AA964003 |
| AF061726_s_at   | 1.85 | Calpain 3                                                                           | AF061726 |
| rc_AA925246_at  | 1.80 | Cathepsin K                                                                         | AA925246 |
| U68562mRNA#2_   | 1.80 | GroEL homolog; mitochondrial chaperonin                                             | U68562   |
| J04024_at       | 1.77 | ATPase, Ca++ transporting, cardiac muscle, slow twitch 2                            | J04024   |
| X86789_at       | 1.72 | Synuclein, gamma                                                                    | X86789   |
| AF020757_s_at   | 1.71 | Purinergic receptor P2X, ligand-gated ion channel, 2                                | AF020757 |
| X13016_at       | 1.68 | CD48 antigen                                                                        | X13016   |
| M84488_at       | 1.64 | Vascular cell adhesion molecule 1                                                   | M84488   |
| D13417_g_at     | 1.63 | Hairy and enhancer of split 1 (Drosophila)                                          | D13417   |
| M64780_g_at     | 1.60 | alternatively spliced protein; Rat agrin mRNA, complete cds.                        | M64780   |
| rc_AI170268_at  | 1.59 | Beta-2 microglobulin                                                                | AI170268 |
| M93257_s_at     | 1.59 | Catechol-O-methyltransferase                                                        | M93257   |
| rc_AI146018_s_a | 1.57 | Transcribed locus, highly similar to NP_004792.1 neurexin 1 [Homo sapiens]          | AI146018 |
| AF030091UTR#1_  | 1.57 | Cyclin L                                                                            | AF030091 |
| AF033109_at     | 1.56 | Syntaxin 8                                                                          | AF033109 |
| rc_AI008865_s_a | 1.55 | Signal transducer and activator of transcription 3                                  | AI008865 |
| AF030089UTR#1_  | 1.55 | Double cortin and calcium/calmodulin-dependent protein kinase-like 1                | AF030089 |
| D90258_s_at     | 1.54 | multicatalytic proteinase complex, component 8; proteasome subunit C8, complete cds | D90258   |
| K03486_s_at     | 1.52 | Protein kinase C, beta 1                                                            | K03486   |
| U08256_at       | 1.52 | Glutamate receptor, ionotropic, delta 2                                             | U08256   |
| rc_AI171319_s_a | 1.52 | Similar to Ini1b                                                                    | AI171319 |
| D26154cds_at    | 1.52 | brain specific protein; Rat mRNA for RB109 (brain specific protein), complete cds.  | D26154   |
| U49953_s_at     | 1.51 | P21 (CDKN1A)-activated kinase 1                                                     | U49953   |

Gene elements in bold font were also upregulated by CGS21680 in Hy.

'--' denotes gene elements absent in control chips and present in PGD<sub>2</sub> chips.

\*Change confirmed as significant by Taqman analysis

^Change NOT found to be significant by Taqman analysis
