# Supplementary material
Source: PubMed Central journal article supplement (PMC2590502)
Supplement: NIHMS79859-supplement-SupTable2A.pdf [file NIHMS79859-supplement-SupTable2A.pdf]

## SuppTable2A.xls

Supplementary Table 2A. Genes found to be downregulated in Basal Forebrain by at least 50% in response to PGD<sub>2</sub> (N=63).

| Probeset Name              | Fold Difference | Gene Name                                                                       | Genbank #       |
|----------------------------|-----------------|---------------------------------------------------------------------------------|-----------------|
| L02615_at                  | --              | Protein kinase inhibitor, alpha                                                 | L02615          |
| L08497cds_at               | --              | Rattus norvegicus GABA-A receptor gamma-2 subunit gene, complete cds.           | L08497          |
| L21995_s_at                | --              | Myelin oligodendrocyte glycoprotein                                             | L21995          |
| M20636_s_at                | --              | phospholipase C-1; Rat phospholipase C-1 mRNA, complete cds.                    | M20636          |
| <b>rc_AI030685_s_at</b>    | <b>--</b>       | <b>Nestin</b>                                                                   | <b>AI030685</b> |
| S77863_s_at                | --              | mu-opioid receptor MOR [rats, peritoneal macrophages, mRNA Partial, 720 nt].    | S77863          |
| U18650_at                  | --              | Huntington disease gene homolog                                                 | U18650          |
| X05137_at                  | --              | Nerve growth factor receptor (TNFR superfamily, member 16)                      | X05137          |
| X57281_at                  | --              | Glycine receptor, alpha 2 subunit                                               | X57281          |
| X74835cds_at               | --              | Cholinergic receptor, nicotinic, delta polypeptide                              | X74835          |
| X77209_at                  | --              | R.norvegicus Hsp70-3 gene.                                                      | X77209          |
| Z11504cds_at               | --              | R.rattus mRNA for NPY-1 receptor.                                               | Z11504          |
| rc_AI137246_s_at           | 16.92           | Ig VH193020=anti-insulin 193020 monoclonal antibody heavy chain variable region | S65980          |
| <b>M86621_at</b>           | <b>13.93</b>    | <b>Calcium channel, voltage-dependent, alpha2/delta subunit 1</b>               | <b>M86621</b>   |
| M81783_at                  | 11.35           | Potassium voltage-gated channel, subfamily F, member 1                          | M81783          |
| Z38067exon_g_at            | 7.42            | R.norvegicus DNA for c-myc, exon 2.                                             | Z38067          |
| AJ012603UTR#1_g_at         | 6.25            | A disintegrin and metalloproteinase domain 17                                   | AJ012603        |
| AF027954_at                | 5.02^           | Bcl-2-related ovarian killer protein (bok)                                      | AF027954        |
| M25157mRNA_i_at            | 4.33            | Superoxide dismutase 1                                                          | M25157          |
| <b>M35077_s_at</b>         | <b>3.55</b>     | <b>Dopamine receptor 1A</b>                                                     | <b>M35077</b>   |
| M64785_g_at                | 3.31            | Arginine vasopressin                                                            | M64785          |
| <b>X17012mRNA_s_at</b>     | <b>2.82*</b>    | <b>Rat IGFI gene for insulin-like growth factor II.</b>                         | <b>X17012</b>   |
| U78090_s_at                | 2.77            | Potassium channel regulator 1                                                   | U78090          |
| M25646_at                  | 2.56            | Arginine vasopressin                                                            | M25646          |
| <b>U88036_at</b>           | <b>2.46</b>     | <b>Solute carrier family 21 (organic anion transporter), member 5</b>           | <b>U88036</b>   |
| M91466_at                  | 2.42            | Adenosine A2B receptor                                                          | M91466          |
| <b>X14788_s_at</b>         | <b>2.40</b>     | <b>CAMP responsive element binding protein 1</b>                                | <b>X14788</b>   |
| AF044910_at                | 2.37            | Survival motor neuron                                                           | AF044910        |
| <b>X51992_at</b>           | <b>2.30*</b>    | <b>Gamma-aminobutyric acid A receptor, alpha 5</b>                              | <b>X51992</b>   |
| M22357_at                  | 1.91            | Myelin-associated glycoprotein                                                  | M22357          |
| Y14635_s_at                | 1.88            | Amiloride-sensitive cation channel 1                                            | Y14635          |
| <b>Z11548_at</b>           | <b>1.86</b>     | <b>Glutamate receptor, ionotropic, kainate 2</b>                                | <b>Z11548</b>   |
| AJ001029_at                | 1.84            | SRY-box containing gene 10                                                      | AJ001029        |
| M59786_at                  | 1.78            | Calcium channel, voltage-dependent, alpha 1C subunit                            | M59786          |
| M31174_g_at                | 1.77            | Thyroid hormone receptor alpha                                                  | M31174          |
| D12573_at                  | 1.75            | Hippocalcin                                                                     | D12573          |
| L08493cds_s_at             | 1.74            | Rattus norvegicus GABA-A receptor alpha-4 subunit gene, complete cds.           | L08493          |
| <b>K03486_s_at</b>         | <b>1.72</b>     | <b>Protein kinase C, beta 1</b>                                                 | <b>K03486</b>   |
| <b>rc_AI176456_at</b>      | <b>1.71</b>     | <b>Transcribed locus, highly similar to NP_032656.1 metallothionein 2</b>       | <b>AI176456</b> |
| <b>rc_AI227647_s_at</b>    | <b>1.70</b>     | <b>Chemokine (C-X3-C motif) ligand 1</b>                                        | <b>AI227647</b> |
| <b>S56679_s_at</b>         | <b>1.70</b>     | <b>GluR-A; AMPA-selective glutamate receptor-A</b>                              | <b>S56679</b>   |
| <b>AF028784mRNA#1_s_at</b> | <b>1.68</b>     | <b>intermediate filament; glial fibrillary acidic proteins alpha and delta</b>  | <b>AF028784</b> |
| Z38067exon_at              | 1.68            | R.norvegicus DNA for c-myc, exon 2.                                             | Z38067          |
| <b>M22254_at</b>           | <b>1.65</b>     | <b>Sodium channel, voltage-gated, type 2, alpha 1 polypeptide</b>               | <b>M22254</b>   |
| <b>rc_AI227665_s_at</b>    | <b>1.65</b>     | <b>V-raf murine sarcoma 3611 viral oncogene homolog 1</b>                       | <b>AI227665</b> |
| <b>AB003992_s_at</b>       | <b>1.65</b>     | <b>Rat mRNA for SNAP-25B, complete cds.</b>                                     | <b>AB003992</b> |
| M12492mRNA#1_g_at          | 1.64            | Protein kinase, cAMP dependent regulatory, type II beta                         | M12492          |
| <b>Y00766_at</b>           | <b>1.64</b>     | <b>Sodium channel, voltage-gated, type III, alpha polypeptide</b>               | <b>Y00766</b>   |
| AF000423_at                | 1.63            | Synaptotagmin 11                                                                | AF000423        |

## SuppTable2A.xls

|                            |             |                                                                                        |                 |
|----------------------------|-------------|----------------------------------------------------------------------------------------|-----------------|
| M92076_at                  | 1.63        | Glutamate receptor, metabotropic 3                                                     | M92076          |
| <b>S71570_s_at</b>         | <b>1.61</b> | <b>CaM kinase II isoform gamma-b</b>                                                   | <b>S71570</b>   |
| M16407_at                  | 1.61        | Cholinergic receptor, muscarinic 3                                                     | M16407          |
| <b>M16112_at</b>           | <b>1.60</b> | <b>Calcium/calmodulin-dependent protein kinase II beta subunit</b>                     | <b>M16112</b>   |
| <b>M55291_at</b>           | <b>1.58</b> | <b>Neurotrophic tyrosine kinase, receptor, type 2</b>                                  | <b>M55291</b>   |
| S46131mRNA_s_at            | 1.56        | D1 receptor; dopamine D1 receptor {promoter} [rats, Genomic, 6251 nt].                 | S46131          |
| <b>AF042714_at</b>         | <b>1.55</b> | <b>Neurexophilin 4</b>                                                                 | <b>AF042714</b> |
| Z11581_at                  | 1.54        | Glutamate receptor, ionotropic, kainate 5                                              | Z11581          |
| <b>D13125_at</b>           | <b>1.53</b> | <b>Neural visinin-like Ca2+binding protein type 2</b>                                  | <b>D13125</b>   |
| AF021923_at                | 1.53        | Solute carrier family 24 (sodium/potassium/calcium exchanger), member 2                | AF021923        |
| K01701_at                  | 1.52        | precursor; Rat oxytocin/neurophysin (Oxt) gene, complete gene, complete cds.           | K01701          |
| <b>AF005720mRNA#3_s_at</b> | <b>1.52</b> | <b>CIC-2Sb; Rattus norvegicus chloride channel (CIC-2) gene, alternatively spliced</b> | <b>AF005720</b> |
| M93273_at                  | 1.52        | Somatostatin receptor 2                                                                | M93273          |
| <b>U34963_s_at</b>         | <b>1.51</b> | <b>Bcl2-like 1</b>                                                                     | <b>U34963</b>   |

Gene elements in bold font were also downregulated by CGS21680 in BF.

'--' denotes gene elements present in control chips and absent in PGD<sub>2</sub> chips.

\*Change confirmed as significant by Taqman analysis

^Change NOT found to be significant by Taqman analysis
