# Supplementary material
Source: PubMed Central journal article supplement (PMC2590502)
Supplement: NIHMS79859-supplement-SupTable2B.pdf [file NIHMS79859-supplement-SupTable2B.pdf]

## SuppTable2B.xls

**Supplementary Table 2B.** Genes found to be downregulated in Cerebral Cortex by at least 50% in response to PGD<sub>2</sub> (N=42).

| Probeset Name           | Fold Difference | Gene Name                                                                                   | Genbank #       |
|-------------------------|-----------------|---------------------------------------------------------------------------------------------|-----------------|
| AF042714_at             | --              | Neurexophilin 4                                                                             | AF042714        |
| AF061726_s_at           | --              | Calpain 3                                                                                   | AF061726        |
| AF081365_s_at           | --              | Potassium inwardly-rectifying channel, subfamily J, member 1                                | AF081365        |
| AFFX-DapX-M_at          | --              | 26.7% identity to the Escherichia coli bifunctional biotin operon repressor                 | L38424          |
| <b>M55049_at</b>        | --              | <b>Interleukin 2 receptor, alpha chain</b>                                                  | <b>M55049</b>   |
| <b>U08259_r_at</b>      | --              | <b>Glutamate receptor, ionotropic, NMDA2C</b>                                               | <b>U08259</b>   |
| U17254_at               | --              | Immediate early gene transcription factor NGFI-B                                            | U17254          |
| U90610_g_at             | --              | Chemokine receptor (LCR1)                                                                   | U90610          |
| X13905cds_g_at          | --              | unnamed protein product; rab1B protein (AA 1 - 201); Rat cDNA for ras-related rab1B protein | X13905          |
| X74834cds_s_at          | --              | Cholinergic receptor, nicotinic, gamma polypeptide                                          | X74834          |
| <b>AF030253_at</b>      | <b>14.23</b>    | <b>Vesicular inhibitory amino acid transporter</b>                                          | <b>AF030253</b> |
| <b>AF030088UTR#1_at</b> | <b>2.98</b>     | <b>Homer, neuronal immediate early gene, 1</b>                                              | <b>AF030088</b> |
| <b>X15468cds_at</b>     | <b>2.35</b>     | <b>Rat mRNA for GABA(A) receptor beta-3 subunit.</b>                                        | <b>X15468</b>   |
| rc_AI178835_at          | 2.31            | Mitogen activated protein kinase kinase 1                                                   | AI178835        |
| AFFX_Rat_GAPDH_3_st     | 2.22            | Glyceraldehyde-3-phosphate dehydrogenase                                                    | X02231          |
| <b>AF021935_at</b>      | <b>2.12</b>     | <b>Ser-Thr protein kinase related to the myotonic dystrophy protein kinase</b>              | <b>AF021935</b> |
| <b>U88036_at</b>        | <b>2.09</b>     | <b>Solute carrier family 21 (organic anion transporter), member 5</b>                       | <b>U88036</b>   |
| U72350_at               | 1.89            | Bcl2-like 1                                                                                 | U72350          |
| D26154cds_at            | 1.87            | brain specific protein; Rat mRNA for RB109 (brain specific protein), complete cds.          | D26154          |
| <b>X51992_at</b>        | <b>1.86^</b>    | <b>Gamma-aminobutyric acid A receptor, alpha 5</b>                                          | <b>X51992</b>   |
| <b>AF023087_s_at</b>    | <b>1.80</b>     | <b>Early growth response 1</b>                                                              | <b>AF023087</b> |
| AF033109_at             | 1.79            | Syntaxin 8                                                                                  | AF033109        |
| M64301_at               | 1.68            | Mitogen-activated protein kinase 6                                                          | M64301          |
| <b>U75397UTR#1_s_at</b> | <b>1.65</b>     | <b>Rattus norvegicus Krox-24 mRNA, 3' untranslated region, partial sequence.</b>            | <b>U75397</b>   |
| AFFX-BioDn-5_at         | 1.65            | ORF 1                                                                                       | J04423          |
| AF075382_at             | 1.63            | Cytokine inducible SH2-containing protein 2                                                 | AF075382        |
| <b>D86039_at</b>        | <b>1.63</b>     | <b>Rattus norvegicus mRNA for ATP-sensitive inwardly rectifying K+ channel, BIR(Kir6.2)</b> | <b>D86039</b>   |
| rc_H33459_at            | 1.60            | Similar to Ini1b                                                                            | H33459          |
| <b>rc_AI008639_at</b>   | <b>1.59</b>     | <b>MAD homolog 4 (Drosophila)</b>                                                           | <b>AI008639</b> |
| AFFX-BioC-5_at          | 1.58            | ORF 1                                                                                       | J04423          |
| D13985_g_at             | 1.58            | Chloride channel, nucleotide-sensitive, 1A                                                  | D13985          |
| <b>AF106563_s_at</b>    | <b>1.58</b>     | <b>PRP; Rattus norvegicus P-glycoprotein-like ATP-binding cassette transporter mRNA</b>     | <b>AF106563</b> |
| AF055477_at             | 1.57            | Calcium channel, voltage-dependent, N type, alpha 1B subunit                                | AF055477        |
| M60753_s_at             | 1.54            | Catechol-O-methyltransferase                                                                | M60753          |
| U17254_g_at             | 1.54            | Immediate early gene transcription factor NGFI-B                                            | U17254          |
| <b>M18416_at</b>        | <b>1.53</b>     | <b>Early growth response 1</b>                                                              | <b>M18416</b>   |
| rc_AI176710_at          | 1.53            | Nuclear receptor subfamily 4, group A, member 3                                             | AI176710        |
| AF078779_g_at           | 1.53            | Voltage gated channel like 1                                                                | AF078779        |
| D25233UTR#1_g_at        | 1.52            | Retinoblastoma 1                                                                            | D25233          |
| J05189_at               | 1.52            | Tachikin receptor 3                                                                         | J05189          |
| AF030091UTR#1_at        | 1.52            | Cyclin L                                                                                    | AF030091        |
| rc_AA924542_s_at        | 1.51            | Mitogen activated protein kinase 14                                                         | AA924542        |

Gene elements in bold font were also downregulated by CGS21680 in Cx.

'--' denotes gene elements present in control chips and absent in PGD<sub>2</sub> chips.

\*Change confirmed as significant by Taqman analysis

^Change NOT found to be significant by Taqman analysis
