# Supplementary material
Source: PubMed Central journal article supplement (PMC2590502)
Supplement: NIHMS79859-supplement-SupTable2C.pdf [file NIHMS79859-supplement-SupTable2C.pdf]

## SuppTable2C.xls

**Supplementary Table 2C.** Genes found to be downregulated in Hypothalamus by at least 50% in response to PGD<sub>2</sub> (N=39).

| Probeset Name                | Fold Difference | Gene Name                                                                                                   | Genbank #       |
|------------------------------|-----------------|-------------------------------------------------------------------------------------------------------------|-----------------|
| <b>AB016161</b> cds_r_at     | --              | <b>Gamma-aminobutyric acid (GABA) B receptor, 1</b>                                                         | <b>AB016161</b> |
| AB017656_s_at                | --              | Cholinergic receptor, muscarinic 3                                                                          | AB017656        |
| <b>AF071495</b> _s_at        | --              | <b>Scavenger receptor class B, member 1</b>                                                                 | <b>AF071495</b> |
| <b>AFFX_Rat_GAPDH_5</b> _st  | --              | <b>Glyceraldehyde-3-phosphate dehydrogenase</b>                                                             | <b>X02231</b>   |
| AFFX-DapX-M_at               | --              | 26.7% identity to the Escherichia coli bifunctional biotin operon repressor                                 | L38424          |
| <b>AFFX-YELO24w/RIP1</b> _at | --              | <b>Rieske iron-sulfur protein; Yeast (S.cerevisiae; DC5) Rieske iron-sulfur protein gene, complete cds.</b> | <b>M23316</b>   |
| AJ224680_g_at                | --              | Cyclic nucleotide-gated channel beta subunit 1                                                              | AJ224680        |
| D14987_f_at                  | --              | Sulfotransferase, hydroxysteroid preferring 2                                                               | D14987          |
| <b>M27223</b> _at            | --              | <b>Rat Na<sup>+</sup> channel mRNA, 3' end.</b>                                                             | <b>M27223</b>   |
| <b>rc_AA799729</b> _at       | --              | <b>Phosphodiesterase 4B</b>                                                                                 | <b>AA799729</b> |
| U73142_at                    | --              | Mitogen activated protein kinase 14                                                                         | U73142          |
| X17184_at                    | --              | Glutamate receptor, ionotropic, AMPA1 (alpha 1)                                                             | X17184          |
| X54656_at                    | --              | Glutamate receptor, ionotropic, AMPA3 (alpha 3)                                                             | X54656          |
| U40188_at                    | 9.83            | TAF9-like RNA polymerase II, TATA box binding protein (TBP)-associated factor, 31 kD                        | U40188          |
| L35771_at                    | 9.56            | Potassium inwardly-rectifying channel, subfamily J, member 5                                                | L35771          |
| <b>X12589</b> cds_s_at       | <b>4.01</b>     | <b>potassium channel protein (AA 1-495); Rat mRNA for voltage-dependent potassium channel protei</b>        | <b>X12589</b>   |
| <b>X17012</b> mRNA_s_at      | <b>3.86*</b>    | <b>Rat IGFII gene for insulin-like growth factor II.</b>                                                    | <b>X17012</b>   |
| rc_AA996551_s_at             | 3.18            | Vesicular inhibitory amino acid transporter                                                                 | AA996551        |
| M88751_at                    | 3.12            | Calcium channel, voltage-dependent, beta 3 subunit                                                          | M88751          |
| M55417exon_s_at              | 3.09            | Rat protein kinase C-gamma (PRKC-gamma) gene, exon 1.                                                       | M55417          |
| E13732cds_at                 | 2.30            | cDNA encoding rat CC chemokine receptor protein.                                                            | E13732          |
| M27293_s_at                  | 2.19            | Insulin-like growth factor 1 receptor                                                                       | M27293          |
| <b>X51992</b> _at            | <b>2.08*</b>    | <b>Gamma-aminobutyric acid A receptor, alpha 5</b>                                                          | <b>X51992</b>   |
| S59525_s_at                  | 2.03            | GnRH-R; gonadotropin-releasing hormone receptor [rats, pituitary gland, mRNA, 2256 nt].                     | S59525          |
| S53987_at                    | 2.03            | mismatch(469[R->P]) in paper; nicotinic receptor alpha 7 subunit [rats, brain, mRNA, 3030 nt].              | S53987          |
| X60769mRNA_at                | 1.82            | CCAAT/enhancer binding protein (C/EBP), beta                                                                | X60769          |
| rc_AA956149_at               | 1.80            | Neurexin 1                                                                                                  | AA956149        |
| rc_A1171166_at               | 1.69            | Suppression of tumorigenicity 13 (colon carcinoma) Hsp70-interacting protein                                | A1171166        |
| M80570_at                    | 1.67            | Solute carrier family 6, member 3                                                                           | M80570          |
| <b>M31433</b> mRNA#1_at      | <b>1.65</b>     | <b>Rat voltage-dependent sodium channel type II protein gene, complete cds.</b>                             | <b>M31433</b>   |
| <b>AF034896</b> _f_at        | <b>1.65</b>     | <b>Olfactory receptor gene Olf1696</b>                                                                      | <b>AF034896</b> |
| <b>AJ001029</b> _at          | <b>1.63</b>     | <b>SRY-box containing gene 10</b>                                                                           | <b>AJ001029</b> |
| AF081365_s_at                | 1.62            | Potassium inwardly-rectifying channel, subfamily J, member 1                                                | AF081365        |
| rc_AA900476_g_at             | 1.61            | Cbp/p300-interacting transactivator, with Glu/Asp-rich carboxy-terminal domain, 2                           | AA900476        |
| U42976_at                    | 1.59            | Cholinergic receptor, nicotinic, beta polypeptide 4                                                         | U42976          |
| D87839_at                    | 1.58            | 4-aminobutyrate aminotransferase                                                                            | D87839          |
| AF042713_at                  | 1.57            | Neurexophilin 3                                                                                             | AF042713        |
| <b>M17960</b> _g_at          | <b>1.54</b>     | <b>Insulin-like growth factor 2</b>                                                                         | <b>M17960</b>   |
| M59786_at                    | 1.52            | Calcium channel, voltage-dependent, alpha 1C subunit                                                        | M59786          |

Gene elements in bold font were also downregulated by CGS21680 in Hy.

'--' denotes gene elements present in control chips and absent in PGD<sub>2</sub> chips.

\*Change confirmed as significant by Taqman analysis

^Change NOT found to be significant by Taqman analysis
