# Supplementary material
Source: PubMed Central journal article supplement (PMC2590502)
Supplement: NIHMS79859-supplement-SupTable3A.pdf [file NIHMS79859-supplement-SupTable3A.pdf]

## SuppTable3A.xls

**Supplementary Table 3A.** Genes found to be upregulated in Basal Forebrain by at least 50% in response to CGS21680 (N=116).

| Probeset Name                | Fold Difference | Gene Name                                                                             | Genbank #       |
|------------------------------|-----------------|---------------------------------------------------------------------------------------|-----------------|
| AB010275_s_at                | --              | Leukemia inhibitory factor                                                            | AB010275        |
| AF000368_at                  | --              | Sodium channel, voltage-gated, type 9, alpha polypeptide                              | AF000368        |
| AF003598_at                  | --              | Integrin beta 7                                                                       | AF003598        |
| AF006619_s_at                | --              | Nitric oxide synthase 2, inducible                                                    | AF006619        |
| <b>AF007583_at</b>           | --              | <b>Collagen-like tail subunit of asymmetric acetylcholinesterase</b>                  | <b>AF007583</b> |
| AF090113_at                  | --              | Glutamate receptor interacting protein 2                                              | AF090113        |
| <b>D00913_at</b>             | --              | <b>ICAM-1; Rattus sp. mRNA for intercellular adhesion molecule-1, complete cds.</b>   | <b>D00913</b>   |
| <b>D44591_s_at</b>           | --              | <b>Nitric oxide synthase 2, inducible</b>                                             | <b>D44591</b>   |
| <b>D83661_s_at</b>           | --              | <b>Nitric oxide synthase 2, inducible</b>                                             | <b>D83661</b>   |
| <b>E01884cds_s_at</b>        | --              | <b>DNA sequence coding for rat IL-1-beta(interleukin-1 beta).</b>                     | <b>E01884</b>   |
| L00981mRNA#2_at              | --              | Rattus norvegicus lymphotoxin (TNF-beta) gene; tumor necrosis factor (TNF-alpha) gene | L00981          |
| L27060_at                    | --              | Phosphodiesterase 4D                                                                  | L27060          |
| M17960_at                    | --              | Insulin-like growth factor 2                                                          | M17960          |
| <b>M26744_at</b>             | --              | <b>Interleukin 6</b>                                                                  | <b>M26744</b>   |
| M26745cds_s_at               | --              | interleukin 6 (IL6); Rat interleukin 6 (IL6) gene, complete cds.                      | M26745          |
| <b>M31837_at</b>             | --              | <b>Insulin-like growth factor binding protein 3</b>                                   | <b>M31837</b>   |
| <b>M34253_at</b>             | --              | <b>Interferon regulatory factor 1</b>                                                 | <b>M34253</b>   |
| M63101cds_at                 | --              | Rat interleukin 1 receptor antagonist gene, complete cds.                             | M63101          |
| M84203_s_at                  | --              | Potassium voltage gated channel, Shaw-related subfamily, member 2                     | M84203          |
| <b>M86389cds_s_at</b>        | -*              | <b>Heat shock 27kDa protein 1</b>                                                     | <b>M86389</b>   |
| S66024_g_at                  | --              | ICER; transcriptional repressor CREM [rats, pineal gland, mRNA, 436 nt].              | S66024          |
| S71597_s_at                  | --              | Nitric oxide synthase 2, inducible                                                    | S71597          |
| <b>S77528cds_s_at</b>        | --              | <b>NFIL-6; Rattus sp. C/EBP-related transcription factor (Nfil6) mRNA</b>             | <b>S77528</b>   |
| U13396_at                    | --              | Janus kinase 2                                                                        | U13396          |
| U14533_at                    | --              | Nuclear receptor subfamily 1, group H, member 2                                       | U14533          |
| <b>U22414_at</b>             | --              | <b>Chemokine (C-C motif) ligand 3</b>                                                 | <b>U22414</b>   |
| <b>U45965_at</b>             | --              | <b>Chemokine (C-X-C motif) ligand 2</b>                                               | <b>U45965</b>   |
| <b>U48829_s_at</b>           | --              | <b>Nitric oxide synthase 2, inducible</b>                                             | <b>U48829</b>   |
| U53927_at                    | --              | Solute carrier family 7, member 3                                                     | U53927          |
| <b>X03347cds_g_at</b>        | --              | <b>polyprotein gag-fos-p75; FBR murine osteosarcoma, complete proviral sequence</b>   | <b>X03347</b>   |
| X06769cds_at                 | --              | unnamed protein product; c-fos protein (AA 1-380); Rat c-fos mRNA.                    | X06769          |
| <b>X69903_at</b>             | --              | <b>Interleukin 4 receptor</b>                                                         | <b>X69903</b>   |
| Z11558_at                    | --              | Glia maturation factor, beta                                                          | Z11558          |
| <b>Z75029_s_at</b>           | --              | <b>Heat shock 70kD protein 1A</b>                                                     | <b>Z75029</b>   |
| <b>M98820_g_at</b>           | 39.63           | <b>Interleukin 1 beta</b>                                                             | <b>M98820</b>   |
| <b>X17053mRNA_s_at</b>       | 18.72           | <b>Rat immediate-early serum-responsive JE gene.</b>                                  | <b>X17053</b>   |
| <b>X60769mRNA_at</b>         | 16.71           | <b>CCAAT/enhancer binding protein (C/EBP), beta</b>                                   | <b>X60769</b>   |
| rc_A1137246_s_at             | 14.38           | Ig VH193020=anti-insulin 193020 monoclonal antibody heavy chain variable region       | S65980          |
| <b>X17053cds_s_at</b>        | 14.25           | <b>Rat immediate-early serum-responsive JE gene.</b>                                  | <b>X17053</b>   |
| <b>J04563_at</b>             | 12.73           | <b>putative; Rat cAMP phosphodiesterase mRNA, 3' end.</b>                             | <b>J04563</b>   |
| <b>U03699complete_seq_at</b> | 11.84           | <b>Nitric oxide synthase 2, inducible</b>                                             | <b>U03699</b>   |
| <b>AF053312_s_at</b>         | 11.64           | <b>Small inducible cytokine subfamily A20</b>                                         | <b>AF053312</b> |
| <b>AF021935_at</b>           | 11.09           | <b>Ser-Thr protein kinase related to the myotonic dystrophy protein kinase</b>        | <b>AF021935</b> |
| <b>J02722cds_at</b>          | 10.78           | <b>heme oxygenase; Rat heme oxygenase gene, complete cds.</b>                         | <b>J02722</b>   |
| <b>M34253_g_at</b>           | 8.66            | <b>Interferon regulatory factor 1</b>                                                 | <b>M34253</b>   |
| <b>rc_AA998683_g_at</b>      | 7.37*           | <b>Heat shock 27kDa protein 1</b>                                                     | <b>AA998683</b> |
| <b>J05122_at</b>             | 6.38            | <b>Benzodiazepin receptor</b>                                                         | <b>J05122</b>   |
| <b>U14647_at</b>             | 6.29            | <b>Caspase 1</b>                                                                      | <b>U14647</b>   |
| <b>D00913_g_at</b>           | 5.80            | <b>ICAM-1; Rattus sp. mRNA for intercellular adhesion molecule-1, complete cds.</b>   | <b>D00913</b>   |
| AJ012603UTR#1_g_at           | 5.80            | A disintegrin and metalloproteinase domain 17                                         | AJ012603        |
| <b>X54686cds_at</b>          | 5.31            | <b>R.norvegicus pJunB gene.</b>                                                       | <b>X54686</b>   |
| <b>X91810_at</b>             | 4.71            | <b>Signal transducer and activator of transcription 3</b>                             | <b>X91810</b>   |
| <b>L16764_s_at</b>           | 4.40            | <b>Heat shock 70kD protein 1A</b>                                                     | <b>L16764</b>   |
| <b>L22558_at</b>             | 4.39*           | <b>5-hydroxytryptamine (serotonin) receptor 7</b>                                     | <b>L22558</b>   |
| rc_A1179610_at               | 4.09            | Heme oxygenase 1                                                                      | A1179610        |
| <b>AF030091UTR#1_at</b>      | 3.92            | <b>Cyclin L</b>                                                                       | <b>AF030091</b> |
| <b>L26267_at</b>             | 3.66            | <b>Nuclear factor kappa B p105 subunit</b>                                            | <b>L26267</b>   |
| <b>M63122_at</b>             | 3.46            | <b>Tumor necrosis factor receptor superfamily, member 1a</b>                          | <b>M63122</b>   |
| <b>Y09507_at</b>             | 3.37            | <b>Hypoxia inducible factor 1, alpha subunit</b>                                      | <b>Y09507</b>   |

## SuppTable3A.xls

|                    |       |                                                                                      |          |
|--------------------|-------|--------------------------------------------------------------------------------------|----------|
| U77777_s_at        | 3.33  | Interleukin 18                                                                       | U77777   |
| AJ222813_s_at      | 3.30  | Interleukin 18                                                                       | AJ222813 |
| M91590_at          | 3.25^ | Arrestin, beta 2                                                                     | M91590   |
| U14647_g_at        | 3.23  | Caspase 1                                                                            | U14647   |
| S79676_s_at        | 3.20  | ICE; interleukin-1 beta-converting enzyme [rats, mRNA Partial, 458 nt].              | S79676   |
| U90610_at          | 3.17  | Chemokine receptor (LCR1)                                                            | U90610   |
| M29866_s_at        | 2.93* | Complement component 3                                                               | M29866   |
| AF044910_g_at      | 2.90  | Survival motor neuron                                                                | AF044910 |
| M34384_at          | 2.80  | Nestin                                                                               | M34384   |
| X06769cds_g_at     | 2.79  | unnamed protein product; c-fos protein (AA 1-380); Rat c-fos mRNA.                   | X06769   |
| M25157mRNA_i_at    | 2.79  | Superoxide dismutase 1                                                               | M25157   |
| U17254_g_at        | 2.75  | Immediate early gene transcription factor NGFI-B                                     | U17254   |
| X06942_at          | 2.61  | V-raf murine sarcoma 3611 viral oncogene homolog 1                                   | X06942   |
| rc_AI236828_s_at   | 2.56  | Signal transducer and activator of transcription 3                                   | AI236828 |
| E13732cds_at       | 2.56  | cDNA encoding rat CC chemokine receptor protein.                                     | E13732   |
| U23056_at          | 2.52  | C-CAM4 protein                                                                       | U23056   |
| rc_AI176658_s_at   | 2.51* | Heat shock 27kDa protein 1                                                           | AI176658 |
| D90258_s_at        | 2.43  | multicatalytic proteinase complex, component 8; proteasome subunit C8, complete cds. | D90258   |
| rc_AI102562_at     | 2.41* | Metallothionein                                                                      | AI102562 |
| AF028784cds#1_s_at | 2.38  | Rattus norvegicus glial fibrillary acidic proteins alpha and delta (GFAP) gene       | AF028784 |
| AF030091UTR#1_g_at | 2.35  | Cyclin L                                                                             | AF030091 |
| rc_AI176710_at     | 2.35  | Nuclear receptor subfamily 4, group A, member 3                                      | AI176710 |
| AB011679_at        | 2.33  | Tubulin, beta 5                                                                      | AB011679 |
| U47031_at          | 2.26  | Purinergic receptor P2X, ligand-gated ion channel, 4                                 | U47031   |
| X52477_at          | 2.22* | Complement component 3                                                               | X52477   |
| M25350_s_at        | 2.22  | Phosphodiesterase 4B                                                                 | M25350   |
| rc_AA945583_at     | 2.12  | Hydroxysteroid (17-beta) dehydrogenase 10                                            | AA945583 |
| U42719_at          | 2.12  | Complement component 4a                                                              | U42719   |
| U48596_at          | 2.08  | Mitogen activated protein kinase kinase kinase 1                                     | U48596   |
| X87157_at          | 2.07  | Neurolysin (metallopeptidase M3 family)                                              | X87157   |
| M23697_at          | 2.05  | Plasminogen activator, tissue                                                        | M23697   |
| X66022mRNA#3_i_at  | 2.03  | Neuronal d4 domain family member                                                     | X66022   |
| U17254_at          | 1.99  | Immediate early gene transcription factor NGFI-B                                     | U17254   |
| L20822_at          | 1.93  | Syntaxin 5a                                                                          | L20822   |
| U90610_g_at        | 1.91  | Chemokine receptor (LCR1)                                                            | U90610   |
| M55417exon_s_at    | 1.90  | Rat protein kinase C-gamma (PRKC-gamma) gene, exon 1.                                | M55417   |
| rc_AI071965_s_at   | 1.88  | cDNA clone UI-R-C2-nl-e-03-0-UI 3', mRNA sequence.                                   | AI071965 |
| M11794cds#2_f_at   | 1.84* | Rat metallothionein-2 and metallothionein-1 genes, complete cds.                     | M11794   |
| M84488_at          | 1.78  | Vascular cell adhesion molecule 1                                                    | M84488   |
| U59801_at          | 1.73  | Integrin alpha M                                                                     | U59801   |
| rc_AA925248_at     | 1.72  | Sodium channel, voltage-gated, type 6, alpha polypeptide                             | AA925248 |
| J04486_at          | 1.71  | Insulin-like growth factor binding protein 2                                         | J04486   |
| U13396_g_at        | 1.69  | Janus kinase 2                                                                       | U13396   |
| rc_AI229707_s_at   | 1.68  | Tubulin, beta 5                                                                      | AI229707 |
| S82649_s_at        | 1.67  | Narp=neuronal activity-regulated pentraxin [rats, hippocampus, mRNA, 2562 nt].       | S82649   |
| M58587_at          | 1.62  | Interleukin 6 receptor                                                               | M58587   |
| X13016_at          | 1.60  | CD48 antigen                                                                         | X13016   |
| AJ132230_g_at      | 1.60  | Bradykinin receptor B1                                                               | AJ132230 |
| AF041373_s_at      | 1.59  | Phosphatidylinositol binding clathrin assembly protein                               | AF041373 |
| AF030089UTR#1_at   | 1.59  | Double cortin and calcium/calmodulin-dependent protein kinase-like 1                 | AF030089 |
| U68562mRNA#2_s_at  | 1.58  | GroEL homolog; mitochondrial chaperonin                                              | U68562   |
| D12498_s_at        | 1.56  | Fibroblast growth factor receptor 1                                                  | D12498   |
| rc_AA925246_at     | 1.55  | Cathepsin K                                                                          | AA925246 |
| M19257_at          | 1.54  | Retinol binding protein 1                                                            | M19257   |
| J03624_at          | 1.53  | Galanin                                                                              | J03624   |
| Y00497_s_at        | 1.53  | Superoxide dismutase 2                                                               | Y00497   |
| X63722cds_s_at     | 1.52  | Vascular cell adhesion molecule 1                                                    | X63722   |

Gene elements in bold font were also upregulated by PGD<sub>2</sub> in BF.

'-' denotes gene elements absent in control chips and present in CGS21680 chips.

\*Change confirmed as significant by Taqman analysis

^Change NOT found to be significant by Taqman analysis
