# Supplementary material
Source: PubMed Central journal article supplement (PMC2590502)
Supplement: NIHMS79859-supplement-SupTable3B.pdf [file NIHMS79859-supplement-SupTable3B.pdf]

**Supplementary Table 3B.** Genes found to be upregulated in Cerebral Cortex by at least 50% in response to CGS21680 (N=40).

| Probeset Name        | Fold Difference | Gene Name                                                                         | Genbank #       |
|----------------------|-----------------|-----------------------------------------------------------------------------------|-----------------|
| AF060173_at          | --              | SV2 related protein                                                               | AF060173        |
| AF081557_at          | --              | Glial cells missing homolog 1 (Drosophila)                                        | AF081557        |
| AF102804_s_at        | --              | Adenosine A3 receptor                                                             | AF102804        |
| AFFX_ratb2/X14115_at | --              | Rat DNA for B2 repeat (1-12) from gamma crystallin gene cluster.                  | X14115          |
| D25290_at            | --              | Cadherin 6                                                                        | D25290          |
| J05122_at            | --              | <b>Benzodiazepin receptor</b>                                                     | <b>J05122</b>   |
| M29866_s_at          | --*             | <b>Complement component 3</b>                                                     | <b>M29866</b>   |
| M54987_at            | --              | <b>Rat corticotropin releasing hormone (CRH) gene, complete cds.</b>              | <b>M54987</b>   |
| S77863_s_at          | --              | <b>mu-opioid receptor MOR</b>                                                     | <b>S77863</b>   |
| U14647_at            | --              | Caspase 1                                                                         | U14647          |
| U64689_at            | --              | Fasciculation and elongation protein zeta 2 (zygin II)                            | U64689          |
| X17053cds_s_at       | --              | Rat immediate-early serum-responsive JE gene.                                     | X17053          |
| X52477_at            | --*             | <b>Complement component 3</b>                                                     | <b>X52477</b>   |
| L16764_s_at          | --              | <b>Heat shock 70kD protein 1A</b>                                                 | <b>L16764</b>   |
| X60769mRNA_at        | 11.20           | <b>CCAAT/enhancer binding protein (C/EBP), beta</b>                               | <b>X60769</b>   |
| rc_AA964003_s_at     | 9.19            | MHC class II RT1-D beta1 chain haplotype a                                        | AA964003        |
| rc_AA998683_g_at     | 8.67*           | <b>Heat shock 27kDa protein 1</b>                                                 | <b>AA998683</b> |
| M11794cds#2_f_at     | 4.84*           | <b>Rat metallothionein-2 and metallothionein-1 genes, complete cds.</b>           | <b>M11794</b>   |
| U78090_s_at          | 3.82            | <b>Potassium channel regulator 1</b>                                              | <b>U78090</b>   |
| AF028784cds#1_s_at   | 3.61            | <b>intermediate filament; glial fibrillary acidic proteins alpha and delta</b>    | <b>AF028784</b> |
| rc_AI176658_s_at     | 3.30*           | <b>Heat shock 27kDa protein 1</b>                                                 | <b>AI176658</b> |
| rc_AI176456_at       | 3.02            | <b>Transcribed locus, highly similar to NP_032656.1 metallothionein 2</b>         | <b>AI176456</b> |
| rc_AI146018_s_at     | 2.74            | <b>Transcribed locus, highly similar to NP_004792.1 neurexin 1</b>                | <b>AI146018</b> |
| X62952_at            | 2.31            | <b>Vimentin</b>                                                                   | <b>X62952</b>   |
| rc_AA945583_at       | 2.27            | Hydroxysteroid (17-beta) dehydrogenase 10                                         | AA945583        |
| M34253_g_at          | 2.22            | Interferon regulatory factor 1                                                    | M34253          |
| L23088_at            | 2.12            | <b>Selectin, platelet</b>                                                         | <b>L23088</b>   |
| AF028784mRNA#1_s_at  | 2.09            | <b>intermediate filament; glial fibrillary acidic proteins alpha and delta</b>    | <b>AF028784</b> |
| AF053312_s_at        | 2.09            | <b>Small inducible cytokine subfamily A20</b>                                     | <b>AF053312</b> |
| rc_AI102562_at       | 1.75*           | <b>Metallothionein</b>                                                            | <b>AI102562</b> |
| rc_AI229237_at       | 1.73            | <b>Opioid receptor-like</b>                                                       | <b>AI229237</b> |
| U31866_g_at          | 1.69            | <b>Transcribed locus, moderately similar to NP_598738.1 transferrin</b>           | <b>U31866</b>   |
| M58587_at            | 1.62            | <b>Interleukin 6 receptor</b>                                                     | <b>M58587</b>   |
| S65355_g_at          | 1.61            | ETB receptor; nonselective-type endothelin receptor [rats, brain, mRNA, 2018 nt]. | S65355          |
| AF016296_at          | 1.60            | Neuropilin                                                                        | AF016296        |
| rc_AI170268_at       | 1.59            | <b>Beta-2 microglobulin</b>                                                       | <b>AI170268</b> |
| L35771_at            | 1.55            | <b>Potassium inwardly-rectifying channel, subfamily J, member 5</b>               | <b>L35771</b>   |
| M23697_at            | 1.52            | Plasminogen activator, tissue                                                     | M23697          |
| AF000423_at          | 1.52            | Synaptotagmin 11                                                                  | AF000423        |
| Y09507_at            | 1.51            | Hypoxia inducible factor 1, alpha subunit                                         | Y09507          |

Gene elements in bold font were also upregulated by PGD<sub>2</sub> in Cx.

'--' denotes gene elements absent in control chips and present in CGS21680 chips.

\*Change confirmed as significant by Taqman analysis

^Change NOT found to be significant by Taqman analysis
