# Supplementary material
Source: PubMed Central journal article supplement (PMC2590502)
Supplement: NIHMS79859-supplement-SupTable3C.pdf [file NIHMS79859-supplement-SupTable3C.pdf]

**Supplementary Table 3C.** Genes found to be upregulated in Hypothalamus by at least 50% in response to CGS21680 (N=70).

| Probeset Name      | Fold Difference | Gene Name                                                                                 | Genbank #       |
|--------------------|-----------------|-------------------------------------------------------------------------------------------|-----------------|
| D00913_at          | —               | <b>ICAM-1; Rattus sp. mRNA for intercellular adhesion molecule-1, complete cds.</b>       | <b>D00913</b>   |
| D00913_g_at        | —               | <b>ICAM-1; Rattus sp. mRNA for intercellular adhesion molecule-1, complete cds.</b>       | <b>D00913</b>   |
| D10106_s_at        | —               | <b>prepropeptide; Rat mRNA for platelet-derived growth factor A chain.</b>                | <b>D10106</b>   |
| D13213_s_at        | —               | <b>Glutamate receptor, ionotropic, NMDA2D</b>                                             | <b>D13213</b>   |
| D25233cds_at       | —               | <b>Retinoblastoma 1</b>                                                                   | <b>D25233</b>   |
| M26744_at          | --              | Interleukin 6                                                                             | M26744          |
| M29866_s_at        | --*             | <b>Complement component 3</b>                                                             | <b>M29866</b>   |
| M86389cds_s_at     | --*             | <b>Heat shock 27kDa protein 1</b>                                                         | <b>M86389</b>   |
| rc_AA818604_s_at   | --              | LOC361797                                                                                 | AA818604        |
| rc_AI071965_s_at   | —               | <b>Rattus norvegicus cDNA clone UH-R-C2-nl-e-03-0-UI 3', mRNA sequence.</b>               | <b>AI071965</b> |
| S77528cds_s_at     | --              | NFIL-6; Rattus sp. C/EBP-related transcription factor (Nfil6) mRNA, complete cds.         | S77528          |
| U14647_g_at        | —               | <b>Caspase 1</b>                                                                          | <b>U14647</b>   |
| U17254_at          | --              | Immediate early gene transcription factor NGFI-B                                          | U17254          |
| U18650_at          | —               | <b>Huntington disease gene homolog</b>                                                    | <b>U18650</b>   |
| X03347cds_g_at     | —               | <b>polyprotein gag-fos-p75; FBR murine osteosarcoma, complete proviral sequence</b>       | <b>X03347</b>   |
| X06769cds_at       | --              | unnamed protein product; c-fos protein (AA 1-380); Rat c-fos mRNA.                        | X06769          |
| X17053cds_s_at     | —               | <b>Rat immediate-early serum-responsive JE gene.</b>                                      | <b>X17053</b>   |
| X17053mRNA_s_at    | —               | <b>Rat immediate-early serum-responsive JE gene.</b>                                      | <b>X17053</b>   |
| U42719_at          | 28.14           | <b>Complement component 4a</b>                                                            | <b>U42719</b>   |
| AF044910_at        | 9.85            | <b>Survival motor neuron</b>                                                              | <b>AF044910</b> |
| X60769mRNA_at      | 9.81            | CCAAT/enhancer binding protein (C/EBP), beta                                              | X60769          |
| AF053312_s_at      | 8.80            | <b>Small inducible cytokine subfamily A20</b>                                             | <b>AF053312</b> |
| X54686cds_at       | 8.35            | <b>R.norvegicus pJunB gene.</b>                                                           | <b>X54686</b>   |
| rc_AA998683_g_at   | 7.61*           | <b>Heat shock 27kDa protein 1</b>                                                         | <b>AA998683</b> |
| U17254_g_at        | 5.98            | Immediate early gene transcription factor NGFI-B                                          | U17254          |
| J05122_at          | 5.67            | <b>Benzodiazepin receptor</b>                                                             | <b>J05122</b>   |
| M17960_at          | 4.33            | <b>Insulin-like growth factor 2</b>                                                       | <b>M17960</b>   |
| rc_AI176658_s_at   | 4.29*           | <b>Heat shock 27kDa protein 1</b>                                                         | <b>AI176658</b> |
| X52477_at          | 4.21*           | <b>Complement component 3</b>                                                             | <b>X52477</b>   |
| AF027954_at        | 3.91^           | <b>Bcl-2-related ovarian killer protein (bok)</b>                                         | <b>AF027954</b> |
| rc_AI176710_at     | 3.63            | Nuclear receptor subfamily 4, group A, member 3                                           | AI176710        |
| M11794cds#2_f_at   | 3.42*           | <b>Rat metallothionein-2 and metallothionein-1 genes, complete cds.</b>                   | <b>M11794</b>   |
| AF028784cds#1_s_at | 3.40            | <b>intermediate filament; glial fibrillary acidic proteins alpha and delta</b>            | <b>AF028784</b> |
| X91810_at          | 3.28            | <b>Signal transducer and activator of transcription 3</b>                                 | <b>X91810</b>   |
| M63122_at          | 3.18            | <b>Tumor necrosis factor receptor superfamily, member 1 a</b>                             | <b>M63122</b>   |
| D42145_at          | 3.14            | Potassium inwardly-rectifying channel, subfamily J, member 8                              | D42145          |
| rc_AI102562_at     | 3.01*           | <b>Metallothionein</b>                                                                    | <b>AI102562</b> |
| U14647_at          | 3.01            | <b>Caspase 1</b>                                                                          | <b>U14647</b>   |
| M34253_g_at        | 2.94            | <b>Interferon regulatory factor 1</b>                                                     | <b>M34253</b>   |
| rc_AI137246_s_at   | 2.89            | <b>Ig VH193020=anti-insulin 193020 monoclonal antibody heavy chain variable region</b>    | <b>S65980</b>   |
| AJ001641_at        | 2.44            | <b>POU domain, class 3, transcription factor 3</b>                                        | <b>AJ001641</b> |
| rc_AI176456_at     | 2.44            | <b>Transcribed locus, highly similar to NP_032656.1 metallothionein 2</b>                 | <b>AI176456</b> |
| X99267_at          | 2.27            | <b>Presenilin-2</b>                                                                       | <b>X99267</b>   |
| AJ222813_s_at      | 2.16            | <b>Interleukin 18</b>                                                                     | <b>AJ222813</b> |
| M58587_at          | 2.05            | <b>Interleukin 6 receptor</b>                                                             | <b>M58587</b>   |
| X06769cds_g_at     | 2.04            | unnamed protein product; c-fos protein (AA 1-380); Rat c-fos mRNA.                        | X06769          |
| U49729_at          | 1.96            | <b>Bcl2-associated X protein</b>                                                          | <b>U49729</b>   |
| AF030091UTR#1_at   | 1.91            | <b>Cyclin L</b>                                                                           | <b>AF030091</b> |
| rc_AA945583_at     | 1.90            | <b>Hydroxysteroid (17-beta) dehydrogenase 10</b>                                          | <b>AA945583</b> |
| X62952_at          | 1.90            | <b>Vimentin</b>                                                                           | <b>X62952</b>   |
| S48813_s_at        | 1.89            | <b>beta-ARK; beta-adrenergic receptor kinase [rats, brain, mRNA Partial, 2141 nt].</b>    | <b>S48813</b>   |
| X07285cds_s_at     | 1.84            | Rat mRNA for basic fibroblast growth factor.                                              | X07285          |
| L20821_at          | 1.82            | <b>Syntaxin 4</b>                                                                         | <b>L20821</b>   |
| D13417_g_at        | 1.80            | <b>Hairy and enhancer of split 1 (Drosophila)</b>                                         | <b>D13417</b>   |
| U31866_g_at        | 1.74            | <b>Transcribed locus, moderately similar to NP_598738.1 transferrin [Mus musculus]</b>    | <b>U31866</b>   |
| U66274_at          | 1.73            | Neuropeptide Y receptor Y5                                                                | U66274          |
| rc_AI235747_at     | 1.69            | <b>Glutathione-S-transferase, alpha type2</b>                                             | <b>AI235747</b> |
| U48596_at          | 1.66            | <b>Mitogen activated protein kinase kinase kinase 1</b>                                   | <b>U48596</b>   |
| M18416_at          | 1.66            | Early growth response 1                                                                   | M18416          |
| Z75029_s_at        | 1.63            | <b>Heat shock 70kD protein 1A</b>                                                         | <b>Z75029</b>   |
| U77777_s_at        | 1.63            | <b>Interleukin 18</b>                                                                     | <b>U77777</b>   |
| X86789_at          | 1.63            | <b>Synuclein, gamma</b>                                                                   | <b>X86789</b>   |
| rc_AA964003_s_at   | 1.62            | <b>MHC class II RT1-D beta1 chain haplotype a</b>                                         | <b>AA964003</b> |
| AF020757_s_at      | 1.59            | <b>Purinergic receptor P2X, ligand-gated ion channel, 2</b>                               | <b>AF020757</b> |
| M23697_at          | 1.58            | Plasminogen activator, tissue                                                             | M23697          |
| M54987_at          | 1.54            | Rat corticotropin releasing hormone (CRH) gene, complete cds.                             | M54987          |
| AF075382_at        | 1.53            | Cytokine inducible SH2-containing protein 2                                               | AF075382        |
| rc_AI146018_s_at   | 1.52            | <b>Transcribed locus, highly similar to NP_004792.1 neurexin 1 [Homo sapiens]</b>         | <b>AI146018</b> |
| AF030091UTR#1_g_at | 1.52            | <b>Cyclin L</b>                                                                           | <b>AF030091</b> |
| M91599mRNA_g_at    | 1.50            | <b>Rattus sp. fibroblast growth factor receptor subtype 4 (FGFR4) mRNA, complete cds.</b> | <b>M91599</b>   |

Gene elements in bold font were also upregulated by PGD<sub>2</sub> in Hy.

"--" denotes gene elements absent in control chips and present in CGS21680 chips.

\*Change confirmed as significant by Taqman analysis

^Change NOT found to be significant by Taqman analysis
