# Supplementary material
Source: PubMed Central journal article supplement (PMC2590502)
Supplement: NIHMS79859-supplement-SupTable4A.pdf [file NIHMS79859-supplement-SupTable4A.pdf]

## SuppTable4A.xls

Supplementary Table 4A. Genes found to be downregulated in Basal Forebrain by at least 50% in response to CGS21680 (N=77).

| Probeset Name           | Fold Difference | Gene Name                                                                                      | Genbank #       |
|-------------------------|-----------------|------------------------------------------------------------------------------------------------|-----------------|
| M21410_s_at             | --              | serotonin 1c receptor; Rat serotonin 1c receptor mRNA, complete cds.                           | M21410          |
| <b>rc_AI030685_s_at</b> | <b>—</b>        | <b>Nestin</b>                                                                                  | <b>A1030685</b> |
| U11418_s_at             | --              | Glutamate receptor, ionotropic, N-methyl D-aspartate 1                                         | U11418          |
| U51898_at               | --              | Phospholipase A2, group VI                                                                     | U51898          |
| U69882_at               | --              | Potassium intermediate/small conductance calcium-activated channel, subfamily N, member 2      | U69882          |
| U73142_at               | --              | Mitogen activated protein kinase 14                                                            | U73142          |
| M31076_at               | 10.58           | Transforming growth factor alpha                                                               | M31076          |
| <b>X17012mRNA_s_at</b>  | <b>3.76*</b>    | <b>Rat IGFII gene for insulin-like growth factor II.</b>                                       | <b>X17012</b>   |
| U37058_at               | 3.69            | Neuromedin B receptor                                                                          | U37058          |
| X12589cds_s_at          | 3.66            | potassium channel protein (AA 1-495); Rat mRNA for voltage-dependent potassium channel protei  | X12589          |
| <b>U88036_at</b>        | <b>3.30</b>     | <b>Solute carrier family 21 (organic anion transporter), member 5</b>                          | <b>U88036</b>   |
| <b>M35077_s_at</b>      | <b>3.18</b>     | <b>Dopamine receptor 1A</b>                                                                    | <b>M35077</b>   |
| U16845_at               | 2.82            | Neurotrimin                                                                                    | U16845          |
| <b>X51992_at</b>        | <b>2.41*</b>    | <b>Gamma-aminobutyric acid A receptor, alpha 5</b>                                             | <b>X51992</b>   |
| rc_AI045501_s_at        | 2.40            | Neuronal pentraxin receptor                                                                    | A1045501        |
| rc_AI178835_at          | 2.25            | Mitogen activated protein kinase kinase 1                                                      | A1178835        |
| <b>AB003992_s_at</b>    | <b>2.18</b>     | <b>Rat mRNA for SNAP-25B, complete cds.</b>                                                    | <b>AB003992</b> |
| J03754Complete_seq_at   | 2.16            | ATPase, Ca transporting, plasma membrane 2                                                     | J03754          |
| X01032_at               | 2.04            | Cholecystokinin                                                                                | X01032          |
| rc_AI228850_s_at        | 2.02            | Microtubule-associated protein 2                                                               | A1228850        |
| <b>S56679_s_at</b>      | <b>1.98</b>     | <b>GluR-A; AMPA-selective glutamate receptor-A</b>                                             | <b>S56679</b>   |
| M26161_at               | 1.97            | Potassium voltage-gated channel, shaker-related subfamily, member 1                            | M26161          |
| X53455cds_s_at          | 1.96            | Rat mRNA for microtubule-associated protein 2.                                                 | X53455          |
| X15468cds_at            | 1.92            | Rat mRNA for GABA(A) receptor beta-3 subunit.                                                  | X15468          |
| X62841mRNA_at           | 1.92            | R.rattus mRNA for potassium channel protein (2858 bp).                                         | X62841          |
| S75687_s_at             | 1.91            | GLAST; glutamate/aspartate transporter [rats, Sprague-Dawley, cochleae, mRNA Partial, 990 nt]. | S75687          |
| <b>X14788_s_at</b>      | <b>1.88</b>     | <b>CAMP responsive element binding protein 1</b>                                               | <b>X14788</b>   |
| M32867_at               | 1.85            | Potassium voltage gated channel, shaker related subfamily, member 4                            | M32867          |
| rc_AI145494_g_at        | 1.82            | Synapsin 2                                                                                     | A1145494        |
| <b>U34963_s_at</b>      | <b>1.82</b>     | <b>Bcl2-like 1</b>                                                                             | <b>U34963</b>   |
| <b>D13125_at</b>        | <b>1.79</b>     | <b>Neural visinin-like Ca2+binding protein type 2</b>                                          | <b>D13125</b>   |
| M36418_s_at             | 1.78            | Glutamate receptor, ionotropic, AMPA1 (alpha 1)                                                | M36418          |
| AB003991_g_at           | 1.78            | rat mRNA for SNAP-25A, complete cds.                                                           | AB003991        |
| D12519_s_at             | 1.78            | Syntaxin 1a                                                                                    | D12519          |
| S59525_s_at             | 1.77            | GnRH-R; gonadotropin-releasing hormone receptor [rats, pituitary gland, mRNA, 2256 nt].        | S59525          |
| U30938_at               | 1.77            | Microtubule-associated protein 2                                                               | U30938          |
| S74265_s_at             | 1.77            | HMW MAP2=high molecular weight microtubule-associated protein                                  | S74265          |
| rc_AI029183_s_at        | 1.76            | Gap junction membrane channel protein alpha 1                                                  | A1029183        |
| AF022819_at             | 1.76            | Putative potassium channel TWIK                                                                | AF022819        |
| <b>M86621_at</b>        | <b>1.74</b>     | <b>Calcium channel, voltage-dependent, alpha2/delta subunit 1</b>                              | <b>M86621</b>   |
| <b>M22254_at</b>        | <b>1.73</b>     | <b>Sodium channel, voltage-gated, type 2, alpha 1 polypeptide</b>                              | <b>M22254</b>   |
| rc_AA955388_s_at        | 1.71            | ATPase, Ca transporting, plasma membrane 2                                                     | AA955388        |
| Z34264_at               | 1.67            | Potassium voltage-gated channel, subfamily H (eag-related), member 1                           | Z34264          |
| M17526_at               | 1.65            | Guanine nucleotide binding protein, alpha o                                                    | M17526          |
| rc_AI235758_s_at        | 1.64            | Protein kinase, cAMP dependent regulatory, type II beta                                        | A1235758        |
| X66022mRNA#1_s_at       | 1.64            | Neuronal d4 domain family member                                                               | X66022          |
| <b>AF042714_at</b>      | <b>1.64</b>     | <b>Neurexophilin 4</b>                                                                         | <b>AF042714</b> |
| D13962_g_at             | 1.63            | Solute carrier family 2, member 2                                                              | D13962          |
| <b>M55291_at</b>        | <b>1.63</b>     | <b>Neurotrophic tyrosine kinase, receptor, type 2</b>                                          | <b>M55291</b>   |

## SuppTable4A.xls

|                            |             |                                                                                                   |                 |
|----------------------------|-------------|---------------------------------------------------------------------------------------------------|-----------------|
| rc_AI171166_at             | 1.63        | Suppression of tumorigenicity 13 (colon carcinoma) Hsp70-interacting protein                      | AI171166        |
| <b>M16112_at</b>           | <b>1.63</b> | <b>Calcium/calmodulin-dependent protein kinase II beta subunit</b>                                | <b>M16112</b>   |
| <b>AF005720mRNA#3_s_at</b> | <b>1.63</b> | <b>CIC-2Sb; Rattus norvegicus chloride channel (CIC-2) gene, alternatively spliced</b>            | <b>AF005720</b> |
| rc_AA893870_g_at           | 1.62        | EST197673 Normalized rat placenta, Bento Soares Rattus sp. cDNA clone RPLAM86 3' end              | AA893870        |
| U56261_s_at                | 1.60        | Synaptosomal-associated protein                                                                   | U56261          |
| <b>Y00766_at</b>           | <b>1.60</b> | <b>Sodium channel, voltage-gated, type III, alpha polypeptide</b>                                 | <b>Y00766</b>   |
| <b>rc_AI176456_at</b>      | <b>1.60</b> | <b>Transcribed locus, highly similar to NP_032656.1 metallothionein 2</b>                         | <b>AI176456</b> |
| L08491cds_at               | 1.59        | first 10 codons are missing; Rattus norvegicus GABA-A receptor alpha-2 subunit gene, partial cds. | L08491          |
| AB016160_g_at              | 1.58        | Gamma-aminobutyric acid (GABA) B receptor, 1                                                      | AB016160        |
| AFFX_ratb1/X12957_at       | 1.58        | Rat DNA for B1 repeat (1-42) from gamma crystallin gene cluster.                                  | X12957          |
| <b>AF028784mRNA#1_s_at</b> | <b>1.58</b> | <b>intermediate filament; Rat glial fibrillary acidic proteins alpha and delta</b>                | <b>AF028784</b> |
| <b>Z11548_at</b>           | <b>1.58</b> | <b>Glutamate receptor, ionotropic, kainate 2</b>                                                  | <b>Z11548</b>   |
| <b>S71570_s_at</b>         | <b>1.57</b> | <b>CaM kinase II isoform gamma-b</b>                                                              | <b>S71570</b>   |
| rc_AI145494_at             | 1.57        | Synapsin 2                                                                                        | AI145494        |
| <b>K03486_s_at</b>         | <b>1.57</b> | <b>Protein kinase C, beta 1</b>                                                                   | <b>K03486</b>   |
| <b>rc_AI227665_s_at</b>    | <b>1.56</b> | <b>V-raf murine sarcoma 3611 viral oncogene homolog 1</b>                                         | <b>AI227665</b> |
| rc_AI228113_s_at           | 1.56        | Neuronal pentraxin receptor                                                                       | AI228113        |
| AJ006710_at                | 1.56        | Phosphatidylinositol 3-kinase                                                                     | AJ006710        |
| rc_AI177026_at             | 1.55        | ATPase, Na transporting, alpha 2                                                                  | AI177026        |
| X54656_at                  | 1.54        | Glutamate receptor, ionotropic, AMPA3 (alpha 3)                                                   | X54656          |
| U50147_at                  | 1.53        | Discs, large homolog 3 (Drosophila)                                                               | U50147          |
| X15467cds_at               | 1.52        | Rat mRNA for GABA(A) receptor beta-2 subunit.                                                     | X15467          |
| <b>rc_AI227647_s_at</b>    | <b>1.52</b> | <b>Chemokine (C-X3-C motif) ligand 1</b>                                                          | <b>AI227647</b> |
| S94371_g_at                | 1.52        | GluR-4c; glutamate receptor subunit 4c                                                            | S94371          |
| L39018_at                  | 1.52        | Sodium channel, voltage-gated, type 8, alpha polypeptide                                          | L39018          |
| U35371_at                  | 1.52        | Contactin 4                                                                                       | U35371          |
| M27812_at                  | 1.51        | Synapsin 1                                                                                        | M27812          |
| M23601_at                  | 1.50        | Monoamine oxidase B                                                                               | M23601          |

Gene elements in bold font were also downregulated by PGD<sub>2</sub> in BF.

'--' denotes gene elements present in control chips and absent in CGS21680 chips.

\*Change confirmed as significant by Taqman analysis

^Change NOT found to be significant by Taqman analysis
