# Supplementary material
Source: PubMed Central journal article supplement (PMC2590502)
Supplement: NIHMS79859-supplement-SupTable4B.pdf [file NIHMS79859-supplement-SupTable4B.pdf]

## SuppTable4B.xls

Supplementary Table 4B. Genes found to be downregulated in Cerebral Cortex by at least 50% in response to CGS21680 (N=40).

| Probeset Name           | Fold Difference         | Gene Name                                                                                                  | Genbank #       |
|-------------------------|-------------------------|------------------------------------------------------------------------------------------------------------|-----------------|
| L22558_at               | --                      | 5-hydroxytryptamine (serotonin) receptor 7                                                                 | L22558          |
| <b>M55049_at</b>        | --                      | <b>Interleukin 2 receptor, alpha chain</b>                                                                 | <b>M55049</b>   |
| M58040_at               | --                      | Transferrin receptor                                                                                       | M58040          |
| S55933_i_at             | --                      | GABAA receptor alpha 4 subunit [rats, mRNA, 1843 nt].                                                      | S55933          |
| <b>U08259_r_at</b>      | --                      | <b>Glutamate receptor, ionotropic, NMDA2C</b>                                                              | <b>U08259</b>   |
| X12744_at               | --                      | Thyroid hormone receptor alpha                                                                             | X12744          |
| X17012mRNA_s_at         | --                      | Rat IGFI gene for insulin-like growth factor II.                                                           | X17012          |
| X17607cds_s_at          | --                      | beta-2 adrenergic receptor (AA 1-418); Rat beta-2 adrenergic receptor gene.                                | X17607          |
| X74835cds_at            | --                      | Cholinergic receptor, nicotinic, delta polypeptide                                                         | X74835          |
| <b>AF030253_at</b>      | <b>31.20</b>            | <b>Vesicular inhibitory amino acid transporter</b>                                                         | <b>AF030253</b> |
| <b>AF021935_at</b>      | <b>10.50</b>            | <b>Ser-Thr protein kinase related to the myotonic dystrophy protein kinase</b>                             | <b>AF021935</b> |
| <b>AF030088UTR#1_at</b> | <b>3.61</b>             | <b>Homer, neuronal immediate early gene, 1</b>                                                             | <b>AF030088</b> |
| <b>X51992_at</b>        | <b>2.10<sup>^</sup></b> | <b>Gamma-aminobutyric acid A receptor, alpha 5</b>                                                         | <b>X51992</b>   |
| <b>X15468cds_at</b>     | <b>2.04</b>             | <b>Rat mRNA for GABA(A) receptor beta-3 subunit.</b>                                                       | <b>X15468</b>   |
| M59980_s_at             | 2.03                    | Potassium voltage gated channel, Shal-related family, member 2                                             | M59980          |
| rc_AI030286_s_at        | 1.98                    | Brain derived neurotrophic factor                                                                          | AI030286        |
| J04024_at               | 1.98                    | ATPase, Ca <sup>++</sup> transporting, cardiac muscle, slow twitch 2                                       | J04024          |
| <b>U75397UTR#1_s_at</b> | <b>1.98</b>             | <b>Rattus norvegicus Krox-24 mRNA, 3' untranslated region, partial sequence.</b>                           | <b>U75397</b>   |
| <b>U88036_at</b>        | <b>1.97</b>             | <b>Solute carrier family 21 (organic anion transporter), member 5</b>                                      | <b>U88036</b>   |
| <b>AF023087_s_at</b>    | <b>1.96</b>             | <b>Early growth response 1</b>                                                                             | <b>AF023087</b> |
| <b>M18416_at</b>        | <b>1.96</b>             | <b>Early growth response 1</b>                                                                             | <b>M18416</b>   |
| AJ006519_at             | 1.85                    | Amiloride-sensitive cation channel 2, neuronal                                                             | AJ006519        |
| M92075_at               | 1.84                    | Glutamate receptor, metabotropic 2                                                                         | M92075          |
| M36420_s_at             | 1.83                    | Glutamate receptor, ionotropic, AMPA3 (alpha 3)                                                            | M36420          |
| rc_AA925246_at          | 1.76                    | Cathepsin K                                                                                                | AA925246        |
| Z11548_at               | 1.76                    | Glutamate receptor, ionotropic, kainate 2                                                                  | Z11548          |
| U16845_at               | 1.76                    | Neurotrimin                                                                                                | U16845          |
| S46131mRNA_s_at         | 1.71                    | D1 receptor; dopamine D1 receptor {promoter} [rats, Genomic, 6251 nt].                                     | S46131          |
| U73142_at               | 1.71                    | Mitogen activated protein kinase 14                                                                        | U73142          |
| AFFX-BioC-3_at          | 1.70                    | ORF 1                                                                                                      | J04423          |
| S94371_at               | 1.67                    | GluR-4c; glutamate receptor subunit 4c                                                                     | S94371          |
| <b>rc_AI008639_at</b>   | <b>1.60</b>             | <b>MAD homolog 4 (Drosophila)</b>                                                                          | <b>AI008639</b> |
| <b>D86039_at</b>        | <b>1.58</b>             | <b>Rattus norvegicus mRNA for ATP-sensitive inwardly rectifying K+ channel, BIR(Kir6.2), complete cds.</b> | <b>D86039</b>   |
| AFFX-BioB-3_at          | 1.56                    | ORF 1                                                                                                      | J04423          |
| <b>AF106563_s_at</b>    | <b>1.55</b>             | <b>PRP; Rattus norvegicus P-glycoprotein-like ATP-binding cassette transporter mRNA, complete cds.</b>     | <b>AF106563</b> |
| U40188_at               | 1.55                    | TAF9-like RNA polymerase II, TATA box binding protein (TBP)-associated factor, 31 kD                       | U40188          |
| M64780_g_at             | 1.55                    | alternatively spliced protein; Rat agrin mRNA, complete cds.                                               | M64780          |
| E12625cds_at            | 1.53                    | cDNA encoding a rat novel protein which is expressed with nerve injury.                                    | E12625          |
| X98564cds_at            | 1.52                    | Potassium channel, subfamily V, member 1                                                                   | X98564          |
| M64780_at               | 1.51                    | alternatively spliced protein; Rat agrin mRNA, complete cds.                                               | M64780          |

Gene elements in bold font were also downregulated by PGD<sub>2</sub> in Cx.

'--' denotes gene elements present in control chips and absent in CGS21680 chips.

\*Change confirmed as significant by Taqman analysis

<sup>^</sup>Change NOT found to be significant by Taqman analysis
