# Supplementary material
Source: PubMed Central journal article supplement (PMC2590502)
Supplement: NIHMS79859-supplement-SupTable4C.pdf [file NIHMS79859-supplement-SupTable4C.pdf]

## SuppTable4C.xls

Supplementary Table 4C. Genes found to be downregulated in Hypothalamus by at least 50% in response to CGS21680 (N=43).

| Probeset Name        | Fold Difference | Gene Name                                                                                                         | Genbank #       |
|----------------------|-----------------|-------------------------------------------------------------------------------------------------------------------|-----------------|
| AB016161cds_r_at     | --              | <b>Gamma-aminobutyric acid (GABA) B receptor, 1</b>                                                               | <b>AB016161</b> |
| AF071495_s_at        | --              | <b>Scavenger receptor class B, member 1</b>                                                                       | <b>AF071495</b> |
| AF109405_s_at        | --              | G protein-coupled receptor 51                                                                                     | AF109405        |
| AFFX_Rat_GAPDH_5_st  | --              | <b>Glyceraldehyde-3-phosphate dehydrogenase</b>                                                                   | <b>X02231</b>   |
| AFFX-YELO24w/RIP1_at | --              | <b>Rieske iron-sulfur protein; Yeast (<i>S.cerevisiae</i>; DC5)</b>                                               | <b>M23316</b>   |
| D10938exon_s_at      | --              | Rattus norvegicus gene for brain-derived neurotrophic factor (BDNF), complete cds.                                | D10938          |
| M27223_at            | --              | <b>Rat Na<sup>+</sup> channel mRNA, 3' end.</b>                                                                   | <b>M27223</b>   |
| M64301_at            | --              | Mitogen-activated protein kinase 6                                                                                | M64301          |
| rc_AA799729_at       | --              | <b>Phosphodiesterase 4B</b>                                                                                       | <b>AA799729</b> |
| S55933_i_at          | --              | GABAA receptor alpha 4 subunit [rats, mRNA, 1843 nt].                                                             | S55933          |
| S94371_g_at          | --              | GluR-4c; glutamate receptor subunit 4c {alternatively spliced} [rats, Sprague-Dawley, cerebellum, mRNA, 3452 nt]. | S94371          |
| M31076_at            | 47.51           | Transforming growth factor alpha                                                                                  | M31076          |
| rc_AA925246_at       | 15.28           | Cathepsin K                                                                                                       | AA925246        |
| M58040_at            | 7.27            | Transferrin receptor                                                                                              | M58040          |
| U88036_at            | 4.99            | Solute carrier family 21 (organic anion transporter), member 5                                                    | U88036          |
| X17012mRNA_s_at      | <b>4.52*</b>    | <b>Rat IGFII gene for insulin-like growth factor II.</b>                                                          | <b>X17012</b>   |
| AJ001029_at          | <b>2.89</b>     | <b>SRY-box containing gene 10</b>                                                                                 | <b>AJ001029</b> |
| AF021935_at          | 2.84            | Ser-Thr protein kinase related to the myotonic dystrophy protein kinase                                           | AF021935        |
| J04486_at            | 2.29            | Insulin-like growth factor binding protein 2                                                                      | J04486          |
| AB016161UTR#1_g_at   | 2.10            | Gamma-aminobutyric acid (GABA) B receptor, 1                                                                      | AB016161        |
| rc_AA893870_g_at     | 1.86            | EST197673 Normalized rat placenta, Bento Soares Rattus sp. cDNA clone RPLAM86 3' end, mRNA sequence.              | AA893870        |
| S94371_at            | 1.85            | GluR-4c; glutamate receptor subunit 4c {alternatively spliced} [rats, Sprague-Dawley, cerebellum, mRNA, 3452 nt]. | S94371          |
| U78090_s_at          | 1.78            | Potassium channel regulator 1                                                                                     | U78090          |
| AF034896_f_at        | <b>1.72</b>     | <b>Olfactory receptor gene Olf1696</b>                                                                            | <b>AF034896</b> |
| M91595exon_s_at      | 1.68            | Rattus norvegicus insulin-like growth factor binding protein-2 gene, exon 1.                                      | M91595          |
| X17682_s_at          | 1.68            | Microtubule-associated protein 2                                                                                  | X17682          |
| M31433mRNA#1_at      | <b>1.68</b>     | <b>Rat voltage-dependent sodium channel type II protein gene, complete cds.</b>                                   | <b>M31433</b>   |
| X51992_at            | <b>1.67*</b>    | <b>Gamma-aminobutyric acid A receptor, alpha 5</b>                                                                | <b>X51992</b>   |
| U73142_g_at          | 1.67            | Mitogen activated protein kinase 14                                                                               | U73142          |
| U31554_at            | 1.64            | Limbic system-associated membrane protein                                                                         | U31554          |
| L04739cds_s_at       | 1.64            | isoform 1; Rattus norvegicus plasma membrane calcium ATPase isoform 1 gene, partial cds.                          | L04739          |
| L09119_at            | 1.62            | Neurogranin                                                                                                       | L09119          |
| M32867_at            | 1.61            | Potassium voltage gated channel, shaker related subfamily, member 4                                               | M32867          |
| X14788_s_at          | 1.60            | CAMP responsive element binding protein 1                                                                         | X14788          |
| S64320_at            | 1.56            | K <sup>+</sup> channel polypeptide; Shal1=K <sup>+</sup> channel polypeptide [rats, hippocampus, mRNA, 3350 nt].  | S64320          |
| M17960_g_at          | <b>1.55</b>     | <b>Insulin-like growth factor 2</b>                                                                               | <b>M17960</b>   |
| X12589cds_s_at       | <b>1.55</b>     | <b>Rat mRNA for voltage-dependent potassium channel protein.</b>                                                  | <b>X12589</b>   |
| rc_AI230211_s_at     | 1.54            | Potassium voltage gated channel, Shal-related family, member 3                                                    | AI230211        |
| rc_AI235758_s_at     | 1.54            | Protein kinase, cAMP dependent regulatory, type II beta                                                           | AI235758        |
| M16407_at            | 1.53            | Cholinergic receptor, muscarinic 3                                                                                | M16407          |
| L20822_at            | 1.53            | Syntaxin 5a                                                                                                       | L20822          |
| AB016160_g_at        | 1.52            | Gamma-aminobutyric acid (GABA) B receptor, 1                                                                      | AB016160        |
| M59980_s_at          | 1.50            | Potassium voltage gated channel, Shal-related family, member 2                                                    | M59980          |

Gene elements in bold font were also downregulated by PGD<sub>2</sub> in Hy.

'--' denotes gene elements present in control chips and absent in CGS21680 chips.

\*Change confirmed as significant by Taqman analysis

^Change NOT found to be significant by Taqman analysis
