# Supplementary material
Source: PubMed Central journal article supplement (PMC2590502)
Supplement: NIHMS79859-supplement-SupTable5.pdf [file NIHMS79859-supplement-SupTable5.pdf]

## SuppTable5.xls

**Supplementary Table 5A.** Genes found to be commonly upregulated by at least 50% in response to PGD2 and during sleep deprivation (Terao et al., 2005).

| Brain Regions | Probeset Name                        | Gene Name                                                                                         | Genbank #                 |
|---------------|--------------------------------------|---------------------------------------------------------------------------------------------------|---------------------------|
| <b>BF</b>     | M54987_at                            | Rat corticotropin releasing hormone (CRH) gene, complete cds.                                     | M54987                    |
| <b>Hy</b>     | AF050663UTR#1_at<br><b>X13016_at</b> | Activity and neurotransmitter-induced early gene 11 (ania-11) mRNA, 3' UTR<br><b>CD48 antigen</b> | AF050663<br><b>X13016</b> |

**Supplementary Table 5B.** Genes found to be commonly downregulated by at least 50% in response to PGD2 and during sleep deprivation (Terao et al., 2005).

| Brain Regions | Probeset Name                                          | Gene Name                                                                                                                                                                                        | Genbank #                         |
|---------------|--------------------------------------------------------|--------------------------------------------------------------------------------------------------------------------------------------------------------------------------------------------------|-----------------------------------|
| <b>BF</b>     | L08493cds_s_at<br><b>M22357_at</b><br>rc_AI137246_s_at | Rattus norvegicus GABA-A receptor alpha-4 subunit gene, complete cds.<br><b>Myelin-associated glycoprotein</b><br>Ig VH193020=anti-insulin 193020 monoclonal antibody heavy chain variable regio | L08493<br><b>M22357</b><br>S65980 |
| <b>Cx</b>     | AF061726_s_at<br>AF081365_s_at<br>rc_AI178835_at       | Calpain 3<br>Potassium inwardly-rectifying channel, subfamily J, member 1<br>Mitogen activated protein kinase kinase 1                                                                           | AF061726<br>AF081365<br>AI178835  |
| <b>Hy</b>     | rc_AI171166_at<br>X60769mRNA_at                        | Suppression of tumorigenicity 13 (colon carcinoma) Hsp70-interacting protein<br>CCAAT/enhancer binding protein (C/EBP), beta                                                                     | AI171166<br>X60769                |

**Supplementary Table 5C.** Genes found to be commonly upregulated by at least 50% in response to PGD2 and during recovery sleep (Terao et al., 2005).

| Brain Regions | Probeset Name                 | Gene Name                                               | Genbank #               |
|---------------|-------------------------------|---------------------------------------------------------|-------------------------|
| <b>Hy</b>     | U67140_at<br><b>X13016_at</b> | Disks large-associated protein 4<br><b>CD48 antigen</b> | U67140<br><b>X13016</b> |

**Supplementary Table 5D.** Genes found to be commonly downregulated by at least 50% in response to PGD2 and during recovery sleep (Terao et al., 2005).

| Brain Regions | Probeset Name                       | Gene Name                                                                    | Genbank #               |
|---------------|-------------------------------------|------------------------------------------------------------------------------|-------------------------|
| <b>BF</b>     | <b>M22357_at</b><br>Z38067exon_g_at | <b>Myelin-associated glycoprotein</b><br>R.norvegicus DNA for c-myc, exon 2. | <b>M22357</b><br>Z38067 |
| <b>Hy</b>     | U73142_at                           | Mitogen activated protein kinase 14                                          | U73142                  |

Gene elements in bold were upregulated during both SD and RS in the same brain region.
