# Supplementary material
Source: PubMed Central journal article supplement (PMC2590502)
Supplement: NIHMS79859-supplement-SupTable6.pdf [file NIHMS79859-supplement-SupTable6.pdf]

## SuppTable6-final.xls

**Supplementary Table 6A.** Genes found to be commonly upregulated by at least 50% in response to CGS21680 and during sleep deprivation (Terao et al., 2005).

| Brain Regions | Probeset Name           | Gene Name                                                     | Genbank #       |
|---------------|-------------------------|---------------------------------------------------------------|-----------------|
| <b>BF</b>     | AF000368_at             | Sodium channel, voltage-gated, type 9, alpha polypeptide      | AF000368        |
|               | <b>rc_AI176710_at</b>   | <b>Nuclear receptor subfamily 4, group A, member 3</b>        | <b>AI176710</b> |
|               | <b>S82649_s_at</b>      | <b>Narp=neuronal activity-regulated pentraxin</b>             | <b>S82649</b>   |
|               | <b>U14533_at</b>        | <b>Nuclear receptor subfamily 1, group H, member 2</b>        | <b>U14533</b>   |
|               | U17254_at               | Immediate early gene transcription factor NGFI-B              | U17254          |
|               | U17254_g_at             | Immediate early gene transcription factor NGFI-B              | U17254          |
|               | <b>Z11558_at</b>        | <b>Glia maturation factor, beta</b>                           | <b>Z11558</b>   |
| <b>Cx</b>     | AF060173_at             | SV2 related protein                                           | AF060173        |
|               | <b>rc_AA964003_s_at</b> | <b>MHC class II RT1-D beta 1 chain haplotype a</b>            | <b>AA964003</b> |
|               | U64689_at               | Fasciculation and elongation protein zeta 2 (zygin II)        | U64689          |
| <b>Hy</b>     | M54987_at               | Rat corticotropin releasing hormone (CRH) gene, complete cds. | M54987          |
|               | <b>rc_AI176710_at</b>   | <b>Nuclear receptor subfamily 4, group A, member 3</b>        | <b>AI176710</b> |
|               | U17254_g_at             | Immediate early gene transcription factor NGFI-B              | U17254          |
|               | <b>U66274_at</b>        | <b>Neuropeptide Y receptor Y5</b>                             | <b>U66274</b>   |

**Supplementary Table 6B.** Genes found to be commonly downregulated by at least 50% in response to CGS21680 and during sleep deprivation (Terao et al., 2005).

| Brain Regions | Probeset Name    | Gene Name                                                                                | Genbank #     |
|---------------|------------------|------------------------------------------------------------------------------------------|---------------|
| <b>BF</b>     | M21410_s_at      | serotonin 1c receptor; Rat serotonin 1c receptor mRNA, complete cds.                     | M21410        |
| <b>Cx</b>     | AJ006519_at      | Amiloride-sensitive cation channel 2, neuronal                                           | AJ006519      |
|               | S94371_at        | GluR-4c; glutamate receptor subunit 4c                                                   | S94371        |
| <b>Hy</b>     | L04739cds_s_at   | isoform 1; Rattus norvegicus plasma membrane calcium ATPase isoform 1 gene, partial cds. | L04739        |
|               | S55933_i_at      | GABAA receptor alpha 4 subunit [rats, mRNA, 1843 nt].                                    | S55933        |
|               | <b>S94371_at</b> | <b>GluR-4c; glutamate receptor subunit 4c</b>                                            | <b>S94371</b> |

**Supplementary Table 6C.** Genes found to be commonly upregulated by at least 50% in response to CGS21680 and during recovery sleep (Terao et al., 2005).

| Brain Regions | Probeset Name           | Gene Name                                                                          | Genbank #       |
|---------------|-------------------------|------------------------------------------------------------------------------------|-----------------|
| <b>BF</b>     | rc_AA925248_at          | Sodium channel, voltage-gated, type 6, alpha polypeptide                           | AA925248        |
|               | rc_AI137246_s_at        | Ig VH193020=anti-insulin 193020 monoclonal antibody heavy chain variable region    | S65980          |
|               | <b>rc_AI176710_at</b>   | <b>Nuclear receptor subfamily 4, group A, member 3</b>                             | <b>AI176710</b> |
|               | <b>S82649_s_at</b>      | <b>Narp=neuronal activity-regulated pentraxin</b>                                  | <b>S82649</b>   |
|               | <b>U14533_at</b>        | <b>Nuclear receptor subfamily 1, group H, member 2</b>                             | <b>U14533</b>   |
|               | <b>Z11558_at</b>        | <b>Glia maturation factor, beta</b>                                                | <b>Z11558</b>   |
| <b>Cx</b>     | M34253_g_at             | Interferon regulatory factor 1                                                     | M34253          |
|               | <b>rc_AA964003_s_at</b> | <b>MHC class II RT1-D beta 1 chain haplotype a</b>                                 | <b>AA964003</b> |
| <b>Hy</b>     | AF075382_at             | Cytokine inducible SH2-containing protein 2                                        | AF075382        |
|               | M91599mRNA_g_at         | Rattus sp. fibroblast growth factor receptor subtype 4 (FGFR4) mRNA, complete cds. | M91599          |
|               | <b>rc_AI176710_at</b>   | <b>Nuclear receptor subfamily 4, group A, member 3</b>                             | <b>AI176710</b> |
|               | <b>U66274_at</b>        | <b>Neuropeptide Y receptor Y5</b>                                                  | <b>U66274</b>   |

**Supplementary Table 6D.** Genes found to be commonly downregulated by at least 50% in response to CGS21680 and during recovery sleep (Terao et al., 2005).

| Brain Regions | Probeset Name      | Gene Name                                            | Genbank #     |
|---------------|--------------------|------------------------------------------------------|---------------|
| <b>BF</b>     | M31076_at          | Transforming growth factor alpha                     | M31076        |
| <b>Cx</b>     | rc_AA925246_at     | Cathepsin K                                          | AA925246      |
| <b>Hy</b>     | AF109405_s_at      | G protein-coupled receptor 51 (GABA B-2 receptor???) | AF109405      |
|               | <b>S94371_g_at</b> | <b>GluR-4c; glutamate receptor subunit 4c</b>        | <b>S94371</b> |

Gene elements in bold were upregulated during both SD and RS in the same brain region.
